# Supplementary material for: Structural, energetic, spectroscopic and QTAIM analyses of cation–π interactions involving mono- and bi-cyclic ring fused benzene systems
Source: Royal Society of Chemistry journal article supplement (doi:10.1039/c3cp53927j), 2013-01-01
Supplement: c3cp53927j.pdf [file c3cp53927j.pdf]

## **Electronic supplementary information**

(35 pages including this page)

**Title:** Structural, energetic, spectroscopic and QTAIM analyses of cation- $\pi$  interactions involving mono- and bi-cyclic ring fused benzene systems

**Authors:** Ayorinde Hassan,<sup>1</sup> Tandabany C. Dinadayalane,<sup>\*,1</sup> Sławomir J. Grabowski,<sup>2,3</sup> and Jerzy Leszczynski<sup>\*,1</sup>

<sup>1</sup>*Interdisciplinary Center for Nanotoxicity, Department of Chemistry, Jackson State University, 1400 JR Lynch Street, P.O. Box 17910, Jackson, MS 39217, USA*

<sup>2</sup>*Faculty of Chemistry, University of the Basque Country UPV/EHU, and Donostia International Physics Center (DIPC), P.K. 1072, 20080 Donostia, Spain*

<sup>3</sup>*IKERBASQUE, Basque Foundation for Science, 48011 Bilbao, Spain*

### **Contents**

**Table S1:** B3LYP/6-311+G(2d,2p) level optimized Cartesian coordinates of all the ligands and their complexes with the point group (PG).

**Table S2:** Total energies, BSSE corrections, and zero-point vibrational energy (ZPVE) corrections, obtained at the B3LYP/6-311+G(2d,2p) level. All values are in hartrees.

**Table S3:** B3LYP/6-311+G(2d,2p) level unscaled vibrational frequencies (in  $\text{cm}^{-1}$ ) for ligands 1-7 and their complexes with the alkali metal ions. The intensities (in  $\text{km/mol}$ ) are given in parentheses.

**Scheme S1:** Structures of ligands with atom numbering that was used for providing NMR chemical shift values.

**Table S4:**  $^{13}\text{C}$  and  $^1\text{H}$  NMR chemical shift values for ligands obtained at the B3LYP/6-311+G(2d,2p) and B3LYP/6-31++G(3df,2p) levels along with the experimental values. Computed chemical shift values are in reference to tetramethylsilane (TMS).

**Table S5:**  $^{13}\text{C}$  and  $^1\text{H}$  NMR chemical shift values obtained for ligands and complexes at the B3LYP/6-31++G(3df,2p) level. The computed chemical shift values are in reference to tetramethylsilane (TMS).

**Table S6:** Atomic Contributions to the Total Energy,  $E(\Omega)$ , of phenanthrene and triphenylene and their corresponding linear counterparts anthracene and naphthacene (in hartree) calculated with the Quantum Theory of Atoms in Molecules (QTAIM) at the B3LYP/6-311+G(2d,2p) level. (See Scheme 2 for atom numbering)

**Table S7:** Atomic energy (in hartrees),  $E(\Omega)$  obtained with atomic integration of atomic basins by QTAIM at the B3LYP/6-311+G(2d,2p) level. The table lists the sum of atomic energy of all carbon atoms,  $\sum E(\Omega_C)$ ; sum of atomic energy of all hydrogen atoms,  $\sum E(\Omega_H)$ ; average energy of all hydrogen atoms,  $\bar{E}_H$ ; and average energy of hydrogen atoms involved in hydrogen-hydrogen interaction,  $\bar{E}_{H\cdots H}$ ; all these values are reported in hartrees. The following entities  $\Delta E(\Omega_C)$ ,  $\Delta E(\Omega_H)$ ,  $[\Delta E(\Omega_H)+\Delta E(\Omega_C)]$ ,  $\Delta \bar{E}_H$ ,  $(\bar{E}_{H\cdots H} - \bar{E}_H)$  are reported in kcal/mol. (See Table S6 for individual atomic contributions to total energies of systems).

**Table S8:** Selected vibrational frequencies ( $\nu_{C-H}$ , in  $\text{cm}^{-1}$ ) corresponding to C–H bonds of bridge  $\text{CH}_2$  unit (that is not on the side of metal ion binding) of bicyclo[2.1.1]hexenyl moiety of ligands (5-7) and their complexes obtained at the B3LYP/6-311+G(2d,2p) level. Intensities (km/mol) are given in parentheses.

**Table S1:** B3LYP/6-311+G(2d,2p) level optimized Cartesian coordinates of all the ligands and their complexes with the point group (PG).

| <b>1</b>            |           |           |          | <b>1-Li<sup>+</sup></b> |           |           |           |
|---------------------|-----------|-----------|----------|-------------------------|-----------|-----------|-----------|
| PG: D <sub>6h</sub> |           |           |          | PG: C <sub>6v</sub>     |           |           |           |
| C                   | 0.000000  | 1.391490  | 0.000000 | Li                      | 0.000000  | 0.000000  | 1.718551  |
| C                   | 1.205066  | 0.695745  | 0.000000 | C                       | 0.000000  | 1.399667  | -0.122087 |
| C                   | 1.205066  | -0.695745 | 0.000000 | C                       | 1.212147  | 0.699834  | -0.122087 |
| C                   | 0.000000  | -1.391490 | 0.000000 | C                       | 1.212147  | -0.699834 | -0.122087 |
| C                   | -1.205066 | -0.695745 | 0.000000 | C                       | 0.000000  | -1.399667 | -0.122087 |
| C                   | -1.205066 | 0.695745  | 0.000000 | C                       | -1.212147 | -0.699834 | -0.122087 |
| H                   | 0.000000  | 2.472996  | 0.000000 | C                       | -1.212147 | 0.699834  | -0.122087 |
| H                   | 2.141677  | 1.236498  | 0.000000 | H                       | 0.000000  | 2.480699  | -0.126751 |
| H                   | 2.141677  | -1.236498 | 0.000000 | H                       | 2.148348  | 1.240349  | -0.126751 |
| H                   | 0.000000  | -2.472996 | 0.000000 | H                       | 2.148348  | -1.240349 | -0.126751 |
| H                   | -2.141677 | -1.236498 | 0.000000 | H                       | 0.000000  | -2.480699 | -0.126751 |
| H                   | -2.141677 | 1.236498  | 0.000000 | H                       | -2.148348 | -1.240349 | -0.126751 |
|                     |           |           |          | H                       | -2.148348 | 1.240349  | -0.126751 |

  

| <b>1-Na<sup>+</sup></b> |           |           |           | <b>1-K<sup>+</sup></b> |           |           |           |
|-------------------------|-----------|-----------|-----------|------------------------|-----------|-----------|-----------|
| PG: C <sub>6v</sub>     |           |           |           | PG: C <sub>6v</sub>    |           |           |           |
| Na                      | 0.000000  | 0.000000  | 1.899069  | K                      | 0.000000  | 0.000000  | 1.986177  |
| C                       | 0.000000  | 1.398028  | -0.493365 | C                      | 0.000000  | 1.396085  | -0.893469 |
| C                       | 1.210728  | 0.699014  | -0.493365 | C                      | 1.209045  | 0.698042  | -0.893469 |
| C                       | 1.210728  | -0.699014 | -0.493365 | C                      | 1.209045  | -0.698042 | -0.893469 |
| C                       | 0.000000  | -1.398028 | -0.493365 | C                      | 0.000000  | -1.396085 | -0.893469 |
| C                       | -1.210728 | -0.699014 | -0.493365 | C                      | -1.209045 | -0.698042 | -0.893469 |
| C                       | -1.210728 | 0.699014  | -0.493365 | C                      | -1.209045 | 0.698042  | -0.893469 |
| H                       | 0.000000  | 2.479083  | -0.521438 | H                      | 0.000000  | 2.476907  | -0.928743 |
| H                       | 2.146949  | 1.239542  | -0.521438 | H                      | 2.145064  | 1.238454  | -0.928743 |
| H                       | 2.146949  | -1.239542 | -0.521438 | H                      | 2.145064  | -1.238454 | -0.928743 |
| H                       | 0.000000  | -2.479083 | -0.521438 | H                      | 0.000000  | -2.476907 | -0.928743 |
| H                       | -2.146949 | -1.239542 | -0.521438 | H                      | -2.145064 | -1.238454 | -0.928743 |
| H                       | -2.146949 | 1.239542  | -0.521438 | H                      | -2.145064 | 1.238454  | -0.928743 |

| <b>2</b>            |          |           |           | <b>2-Li<sup>+</sup></b> |           |           |           |
|---------------------|----------|-----------|-----------|-------------------------|-----------|-----------|-----------|
| PG: D <sub>2h</sub> |          |           |           | PG: Cs                  |           |           |           |
| C                   | 0.000000 | 1.241619  | 1.398264  | Li                      | -1.708179 | -1.276614 | 0.000000  |
| C                   | 0.000000 | 2.425848  | 0.706433  | C                       | 0.108419  | -1.186491 | 1.403292  |
| C                   | 0.000000 | 2.425848  | -0.706433 | C                       | 0.152177  | -2.379785 | 0.709525  |
| C                   | 0.000000 | 1.241619  | -1.398264 | C                       | 0.152177  | -2.379785 | -0.709525 |
| C                   | 0.000000 | -1.241619 | -1.398264 | C                       | 0.108419  | -1.186491 | -1.403292 |
| C                   | 0.000000 | -2.425848 | -0.706433 | C                       | 0.032185  | 1.304455  | -1.407357 |
| C                   | 0.000000 | -2.425848 | 0.706433  | C                       | 0.008752  | 2.481532  | -0.708023 |
| C                   | 0.000000 | -1.241619 | 1.398264  | C                       | 0.008752  | 2.481532  | 0.708023  |
| C                   | 0.000000 | 0.000000  | 0.714465  | C                       | 0.032185  | 1.304455  | 1.407357  |
| C                   | 0.000000 | 0.000000  | -0.714465 | C                       | 0.069252  | 0.062262  | 0.719064  |
| H                   | 0.000000 | 1.240740  | 2.480691  | C                       | 0.069252  | 0.062262  | -0.719064 |
| H                   | 0.000000 | 3.366039  | 1.240859  | H                       | 0.111240  | -1.188662 | 2.485143  |
| H                   | 0.000000 | 3.366039  | -1.240859 | H                       | 0.191550  | -3.317580 | 1.245158  |
| H                   | 0.000000 | 1.240740  | -2.480691 | H                       | 0.191550  | -3.317580 | -1.245158 |
| H                   | 0.000000 | -1.240740 | -2.480691 | H                       | 0.111240  | -1.188662 | -2.485143 |
| H                   | 0.000000 | -3.366039 | -1.240859 | H                       | 0.040487  | 1.306052  | -2.488735 |
| H                   | 0.000000 | -3.366039 | 1.240859  | H                       | -0.005717 | 3.423268  | -1.237901 |
| H                   | 0.000000 | -1.240740 | 2.480691  | H                       | -0.005717 | 3.423268  | 1.237901  |
|                     |          |           |           | H                       | 0.040487  | 1.306052  | 2.488735  |

  

| <b>2-Na<sup>+</sup></b> |           |           |           | <b>2-K<sup>+</sup></b> |           |           |           |
|-------------------------|-----------|-----------|-----------|------------------------|-----------|-----------|-----------|
| PG: C <sub>s</sub>      |           |           |           | PG: Cs                 |           |           |           |
| Na                      | -1.870007 | -1.355110 | 0.000000  | K                      | -1.841442 | -1.524965 | 0.000000  |
| C                       | 0.473725  | -1.012585 | 1.402873  | C                      | 0.899181  | -0.756315 | 1.401289  |
| C                       | 0.649721  | -2.190588 | 0.709535  | C                      | 1.270352  | -1.885773 | 0.708390  |
| C                       | 0.649721  | -2.190588 | -0.709535 | C                      | 1.270352  | -1.885773 | -0.708390 |
| C                       | 0.473725  | -1.012585 | -1.402873 | C                      | 0.899181  | -0.756315 | -1.401289 |
| C                       | 0.120255  | 1.452653  | -1.404674 | C                      | 0.123338  | 1.608535  | -1.403181 |
| C                       | -0.035496 | 2.622564  | -0.706943 | C                      | -0.240631 | 2.732882  | -0.706846 |
| C                       | -0.035496 | 2.622564  | 0.706943  | C                      | -0.240631 | 2.732882  | 0.706846  |
| C                       | 0.120255  | 1.452653  | 1.404674  | C                      | 0.123338  | 1.608535  | 1.403181  |
| C                       | 0.289003  | 0.222107  | 0.718040  | C                      | 0.505939  | 0.426524  | 0.716906  |
| C                       | 0.289003  | 0.222107  | -0.718040 | C                      | 0.505939  | 0.426524  | -0.716906 |
| H                       | 0.500791  | -1.010098 | 2.484823  | H                      | 0.928858  | -0.747767 | 2.483382  |
| H                       | 0.817703  | -3.114859 | 1.244643  | H                      | 1.593845  | -2.768116 | 1.243241  |
| H                       | 0.817703  | -3.114859 | -1.244643 | H                      | 1.593845  | -2.768116 | -1.243241 |
| H                       | 0.500791  | -1.010098 | -2.484823 | H                      | 0.928858  | -0.747767 | -2.483382 |
| H                       | 0.134333  | 1.456686  | -2.486319 | H                      | 0.140516  | 1.616259  | -2.485004 |
| H                       | -0.151031 | 3.556474  | -1.238387 | H                      | -0.518591 | 3.631670  | -1.238893 |
| H                       | -0.151031 | 3.556474  | 1.238387  | H                      | -0.518591 | 3.631670  | 1.238893  |
| H                       | 0.134333  | 1.456686  | 2.486319  | H                      | 0.140516  | 1.616259  | 2.485004  |

| <b>3</b>            |          |           |           | <b>3-Li<sup>+</sup></b> |           |           |           |
|---------------------|----------|-----------|-----------|-------------------------|-----------|-----------|-----------|
| PG: C <sub>2v</sub> |          |           |           | PG: C <sub>s</sub>      |           |           |           |
| C                   | 0.000000 | 2.829732  | 0.875660  | Li                      | -0.902600 | 1.734498  | 0.000000  |
| C                   | 0.000000 | 0.677227  | 2.088400  | C                       | -0.850042 | -0.079838 | 2.844310  |
| C                   | 0.000000 | 1.419024  | 0.863555  | C                       | -0.836444 | -0.076649 | 1.429199  |
| C                   | 0.000000 | 0.727298  | -0.378864 | C                       | -2.065082 | -0.106977 | 0.682475  |
| C                   | 0.000000 | -0.727298 | -0.378864 | C                       | 0.411856  | -0.038761 | 0.731200  |
| C                   | 0.000000 | -1.419024 | 0.863555  | C                       | 0.411856  | -0.038761 | -0.731200 |
| C                   | 0.000000 | 3.550693  | -0.296104 | C                       | -0.836444 | -0.076649 | -1.429199 |
| C                   | 0.000000 | 2.873635  | -1.525116 | C                       | 0.323540  | -0.057568 | 3.556060  |
| C                   | 0.000000 | 1.495848  | -1.561923 | C                       | 1.553776  | -0.018181 | 2.875813  |
| C                   | 0.000000 | -1.495848 | -1.561923 | C                       | 1.598193  | -0.003460 | 1.500932  |
| C                   | 0.000000 | -2.873635 | -1.525116 | C                       | 1.598193  | -0.003460 | -1.500932 |
| C                   | 0.000000 | -3.550693 | -0.296104 | C                       | 1.553776  | -0.018181 | -2.875813 |
| C                   | 0.000000 | -2.829732 | 0.875660  | C                       | 0.323540  | -0.057568 | -3.556060 |
| C                   | 0.000000 | -0.677227 | 2.088400  | C                       | -0.850042 | -0.079838 | -2.844310 |
| H                   | 0.000000 | 3.340190  | 1.830132  | C                       | -2.065082 | -0.106977 | -0.682475 |
| H                   | 0.000000 | 1.225715  | 3.021407  | H                       | -1.801962 | -0.117463 | 3.356375  |
| H                   | 0.000000 | 4.631729  | -0.272134 | H                       | -2.999356 | -0.137505 | 1.226610  |
| H                   | 0.000000 | 3.434537  | -2.449739 | H                       | 0.304956  | -0.073501 | 4.636236  |
| H                   | 0.000000 | 1.004942  | -2.523316 | H                       | 2.476012  | -0.003284 | 3.439002  |
| H                   | 0.000000 | -1.004942 | -2.523316 | H                       | 2.559466  | 0.018607  | 1.012002  |
| H                   | 0.000000 | -3.434537 | -2.449739 | H                       | 2.559466  | 0.018607  | -1.012002 |
| H                   | 0.000000 | -4.631729 | -0.272134 | H                       | 2.476012  | -0.003284 | -3.439002 |
| H                   | 0.000000 | -3.340190 | 1.830132  | H                       | 0.304956  | -0.073501 | -4.636236 |
| H                   | 0.000000 | -1.225715 | 3.021407  | H                       | -1.801962 | -0.117463 | -3.356375 |
|                     |          |           |           | H                       | -2.999356 | -0.137505 | -1.226610 |

  

| <b>3-Na<sup>+</sup></b> |           |           |           |
|-------------------------|-----------|-----------|-----------|
| PG: C <sub>s</sub>      |           |           |           |
| Na                      | -1.030303 | 1.983807  | 0.000000  |
| C                       | -0.748935 | -0.355864 | 2.840095  |
| C                       | -0.736700 | -0.346323 | 1.426866  |
| C                       | -1.953509 | -0.521269 | 0.680668  |
| C                       | 0.498153  | -0.169215 | 0.730941  |
| C                       | 0.498153  | -0.169215 | -0.730941 |
| C                       | -0.736700 | -0.346323 | -1.426866 |
| C                       | 0.414610  | -0.199580 | 3.556008  |
| C                       | 1.631409  | -0.022393 | 2.877748  |
| C                       | 1.671984  | -0.005114 | 1.500585  |
| C                       | 1.671984  | -0.005114 | -1.500585 |
| C                       | 1.631409  | -0.022393 | -2.877748 |
| C                       | 0.414610  | -0.199580 | -3.556008 |
| C                       | -0.748935 | -0.355864 | -2.840095 |
| C                       | -1.953509 | -0.521269 | -0.680668 |

  

|   |           |           |           |
|---|-----------|-----------|-----------|
| H | -1.689937 | -0.506023 | 3.352374  |
| H | -2.874577 | -0.679645 | 1.226053  |
| H | 0.395983  | -0.220071 | 4.636197  |
| H | 2.547001  | 0.093827  | 3.440082  |
| H | 2.626128  | 0.119529  | 1.012310  |
| H | 2.626128  | 0.119529  | -1.012310 |
| H | 2.547001  | 0.093827  | -3.440082 |
| H | 0.395983  | -0.220071 | -4.636197 |
| H | -1.689937 | -0.506023 | -3.352374 |
| H | -2.874577 | -0.679645 | -1.226053 |

| <b>3-K<sup>+</sup></b> |           |           |           | <b>4</b>            |           |           |          |
|------------------------|-----------|-----------|-----------|---------------------|-----------|-----------|----------|
| PG: C <sub>s</sub>     |           |           |           | PG: D <sub>3h</sub> |           |           |          |
| K                      | -1.411476 | 1.956615  | 0.00000   | C                   | 0.708019  | 1.253801  | 0.000000 |
| C                      | -0.530044 | -0.720944 | 2.836988  | C                   | 1.439833  | -0.013738 | 0.000000 |
| C                      | -0.516609 | -0.718751 | 1.424042  | C                   | 0.731814  | -1.240063 | 0.000000 |
| C                      | -1.652942 | -1.183370 | 0.679546  | C                   | -0.731814 | -1.240063 | 0.000000 |
| C                      | 0.639459  | -0.253904 | 0.729730  | C                   | -1.439833 | -0.013738 | 0.000000 |
| C                      | 0.639459  | -0.253904 | -0.729730 | C                   | -0.708019 | 1.253801  | 0.000000 |
| C                      | -0.516609 | -0.718751 | -1.424042 | C                   | 1.379626  | 2.492950  | 0.000000 |
| C                      | 0.557463  | -0.279857 | 3.554876  | C                   | -1.379626 | 2.492950  | 0.000000 |
| C                      | 1.697771  | 0.180593  | 2.877187  | C                   | 0.698414  | 3.691065  | 0.000000 |
| C                      | 1.736928  | 0.193555  | 1.499308  | C                   | -0.698414 | 3.691065  | 0.000000 |
| C                      | 1.736928  | 0.193555  | -1.499308 | H                   | 2.457418  | 2.520725  | 0.000000 |
| C                      | 1.697771  | 0.180593  | -2.877187 | H                   | -2.457418 | 2.520725  | 0.000000 |
| C                      | 0.557463  | -0.279857 | -3.554876 | H                   | 1.245797  | 4.623570  | 0.000000 |
| C                      | -0.530044 | -0.720944 | -2.836988 | H                   | -1.245797 | 4.623570  | 0.000000 |
| C                      | -1.652942 | -1.183370 | -0.679546 | C                   | 1.469145  | -2.441266 | 0.000000 |
| H                      | -1.407693 | -1.092643 | 3.349163  | C                   | 2.848771  | -0.051684 | 0.000000 |
| H                      | -2.508230 | -1.559388 | 1.225680  | C                   | 2.847349  | -2.450377 | 0.000000 |
| H                      | 0.540131  | -0.296041 | 4.635251  | C                   | 3.545763  | -1.240689 | 0.000000 |
| H                      | 2.556909  | 0.518168  | 3.439440  | H                   | 0.954303  | -3.388549 | 0.000000 |
| H                      | 2.635759  | 0.538137  | 1.011296  | H                   | 3.411720  | 0.867824  | 0.000000 |
| H                      | 2.635759  | 0.538137  | -1.011296 | H                   | 4.627027  | -1.232893 | 0.000000 |
| H                      | 2.556909  | 0.518168  | -3.439440 | H                   | 3.381230  | -3.390677 | 0.000000 |
| H                      | 0.540131  | -0.296041 | -4.635251 | C                   | -2.848771 | -0.051684 | 0.000000 |
| H                      | -1.407693 | -1.092643 | -3.349163 | C                   | -1.469145 | -2.441266 | 0.000000 |
| H                      | -2.508230 | -1.559388 | -1.225680 | C                   | -3.545763 | -1.240689 | 0.000000 |
|                        |           |           |           | C                   | -2.847349 | -2.450377 | 0.000000 |
|                        |           |           |           | H                   | -3.411720 | 0.867824  | 0.000000 |
|                        |           |           |           | H                   | -0.954303 | -3.388549 | 0.000000 |
|                        |           |           |           | H                   | -4.627027 | -1.232893 | 0.000000 |
|                        |           |           |           | H                   | -3.381230 | -3.390677 | 0.000000 |

| <b>4-Li<sup>+</sup></b> |           |                     |           | <b>4-Na<sup>+</sup></b> |           |                     |           |
|-------------------------|-----------|---------------------|-----------|-------------------------|-----------|---------------------|-----------|
|                         |           | PG: C <sub>3v</sub> |           |                         |           | PG: C <sub>3v</sub> |           |
| Li                      | 0.000000  | 0.000000            | 1.757841  | Na                      | 0.000000  | 0.000000            | 2.141293  |
| C                       | 0.712132  | 1.260404            | -0.044995 | C                       | 0.711099  | 1.259578            | -0.192599 |
| C                       | 1.447608  | -0.013478           | -0.044995 | C                       | 1.446376  | -0.013959           | -0.192599 |
| C                       | 0.735476  | -1.246927           | -0.044995 | C                       | 0.735277  | -1.245618           | -0.192599 |
| C                       | -0.735476 | -1.246927           | -0.044995 | C                       | -0.735277 | -1.245618           | -0.192599 |
| C                       | -1.447608 | -0.013478           | -0.044995 | C                       | -1.446376 | -0.013959           | -0.192599 |
| C                       | -0.712132 | 1.260404            | -0.044995 | C                       | -0.711099 | 1.259578            | -0.192599 |
| C                       | 1.386078  | 2.503469            | -0.039441 | C                       | 1.384014  | 2.501105            | -0.193200 |
| C                       | -1.386078 | 2.503469            | -0.039441 | C                       | -1.384014 | 2.501105            | -0.193200 |
| C                       | 0.700026  | 3.695374            | -0.045334 | C                       | 0.699044  | 3.696292            | -0.199129 |
| C                       | -0.700026 | 3.695374            | -0.045334 | C                       | -0.699044 | 3.696292            | -0.199129 |
| H                       | 2.463255  | 2.532749            | -0.046769 | H                       | 2.461448  | 2.530978            | -0.205264 |
| H                       | -2.463255 | 2.532749            | -0.046769 | H                       | -2.461448 | 2.530978            | -0.205264 |
| H                       | 1.243707  | 4.629122            | -0.053531 | H                       | 1.244095  | 4.629299            | -0.210869 |
| H                       | -1.243707 | 4.629122            | -0.053531 | H                       | -1.244095 | 4.629299            | -0.210869 |
| C                       | 1.475028  | -2.452113           | -0.039441 | C                       | 1.474013  | -2.449143           | -0.193200 |
| C                       | 2.861107  | -0.051355           | -0.039441 | C                       | 2.858027  | -0.051961           | -0.193200 |
| C                       | 2.850275  | -2.453928           | -0.045334 | C                       | 2.851561  | -2.453536           | -0.199129 |
| C                       | 3.550301  | -1.241447           | -0.045334 | C                       | 3.550605  | -1.242757           | -0.199129 |
| H                       | 0.961797  | -3.399616           | -0.046769 | H                       | 0.961167  | -3.397166           | -0.205264 |
| H                       | 3.425053  | 0.866867            | -0.046769 | H                       | 3.422615  | 0.866188            | -0.205264 |
| H                       | 4.630791  | -1.237479           | -0.053531 | H                       | 4.631138  | -1.237232           | -0.210869 |
| H                       | 3.387084  | -3.391643           | -0.053531 | H                       | 3.387043  | -3.392067           | -0.210869 |
| C                       | -2.861107 | -0.051355           | -0.039441 | C                       | -2.858027 | -0.051961           | -0.193200 |
| C                       | -1.475028 | -2.452113           | -0.039441 | C                       | -1.474013 | -2.449143           | -0.193200 |
| C                       | -3.550301 | -1.241447           | -0.045334 | C                       | -3.550605 | -1.242757           | -0.199129 |
| C                       | -2.850275 | -2.453928           | -0.045334 | C                       | -2.851561 | -2.453536           | -0.199129 |
| H                       | -3.425053 | 0.866867            | -0.046769 | H                       | -3.422615 | 0.866188            | -0.205264 |
| H                       | -0.961797 | -3.399616           | -0.046769 | H                       | -0.961167 | -3.397166           | -0.205264 |
| H                       | -4.630791 | -1.237479           | -0.053531 | H                       | -4.631138 | -1.237232           | -0.210869 |
| H                       | -3.387084 | -3.391643           | -0.053531 | H                       | -3.387043 | -3.392067           | -0.210869 |

| <b>4-K<sup>+</sup></b> |           |           | PG: C <sub>3v</sub> | <b>5</b> |           |           | PG: C <sub>s</sub> |
|------------------------|-----------|-----------|---------------------|----------|-----------|-----------|--------------------|
| K                      | 0.000000  | 0.000000  | 2.418039            | C        | -0.701265 | -0.070308 | 0.000000           |
| C                      | 0.710074  | 1.257516  | -0.384813           | C        | -1.590061 | 0.980104  | 0.000000           |
| C                      | 1.444078  | -0.013816 | -0.384813           | C        | -1.064404 | 2.284332  | 0.000000           |
| C                      | 0.734004  | -1.243700 | -0.384813           | C        | 0.306084  | 2.501491  | 0.000000           |
| C                      | -0.734004 | -1.243700 | -0.384813           | C        | 1.209366  | 1.423703  | 0.000000           |
| C                      | -1.444078 | -0.013816 | -0.384813           | C        | 0.688985  | 0.150004  | 0.000000           |
| C                      | -0.710074 | 1.257516  | -0.384813           | C        | -0.794998 | -1.586184 | 0.000000           |
| C                      | 1.382975  | 2.498816  | -0.381104           | C        | 1.246377  | -1.263100 | 0.000000           |
| C                      | -1.382975 | 2.498816  | -0.381104           | C        | 0.306084  | -1.932729 | 1.062662           |
| C                      | 0.698947  | 3.695180  | -0.379650           | C        | 0.306084  | -1.932729 | -1.062662          |
| C                      | -0.698947 | 3.695180  | -0.379650           | H        | 0.475847  | -3.004777 | 1.157499           |
| H                      | 2.460486  | 2.528855  | -0.395715           | H        | 0.231665  | -1.462451 | 2.041503           |
| H                      | -2.460486 | 2.528855  | -0.395715           | H        | 0.475847  | -3.004777 | -1.157499          |
| H                      | 1.244447  | 4.628046  | -0.388011           | H        | 0.231665  | -1.462451 | -2.041503          |
| H                      | -1.244447 | 4.628046  | -0.388011           | H        | 2.322389  | -1.406934 | 0.000000           |
| C                      | 1.472550  | -2.447099 | -0.381104           | H        | -1.774007 | -2.055201 | 0.000000           |
| C                      | 2.855525  | -0.051716 | -0.381104           | H        | -1.738473 | 3.130224  | 0.000000           |
| C                      | 2.850646  | -2.452896 | -0.379650           | H        | -2.660580 | 0.821049  | 0.000000           |
| C                      | 3.549593  | -1.242284 | -0.379650           | H        | 2.276594  | 1.603462  | 0.000000           |
| H                      | 0.959810  | -3.395271 | -0.395715           | H        | 0.685550  | 3.514349  | 0.000000           |
| H                      | 3.420296  | 0.866416  | -0.395715           |          |           |           |                    |
| H                      | 4.630230  | -1.236300 | -0.388011           |          |           |           |                    |
| H                      | 3.385782  | -3.391746 | -0.388011           |          |           |           |                    |
| C                      | -2.855525 | -0.051716 | -0.381104           |          |           |           |                    |
| C                      | -1.472550 | -2.447099 | -0.381104           |          |           |           |                    |
| C                      | -3.549593 | -1.242284 | -0.379650           |          |           |           |                    |
| C                      | -2.850646 | -2.452896 | -0.379650           |          |           |           |                    |
| H                      | -3.420296 | 0.866416  | -0.395715           |          |           |           |                    |
| H                      | -0.959810 | -3.395271 | -0.395715           |          |           |           |                    |
| H                      | -4.630230 | -1.236300 | -0.388011           |          |           |           |                    |
| H                      | -3.385782 | -3.391746 | -0.388011           |          |           |           |                    |

  

| <b>5-Li<sup>+</sup></b> |           |           | PG: C <sub>s</sub> |   |           |           |           |
|-------------------------|-----------|-----------|--------------------|---|-----------|-----------|-----------|
| Li                      | 1.695333  | 1.361130  | 0.000000           | H | 1.121912  | -3.099418 | 0.000000  |
| C                       | -0.038204 | -0.025806 | 0.709668           | H | 2.028947  | -1.563211 | 0.000000  |
| C                       | -0.099535 | 1.159436  | 1.423184           | H | -1.176690 | -3.093487 | 0.000000  |
| C                       | -0.172809 | 2.371783  | 0.697646           | H | -2.065872 | -1.538642 | 0.000000  |
| C                       | -0.172809 | 2.371783  | -0.697646          | H | -0.019340 | -1.809890 | -2.079115 |
| C                       | -0.099535 | 1.159436  | -1.423184          | H | -0.019340 | -1.809890 | 2.079115  |
| C                       | -0.038204 | -0.025806 | -0.709668          | H | -0.234416 | 3.309242  | 1.232016  |
| C                       | -0.019808 | -1.503026 | 1.039814           | H | -0.108665 | 1.172553  | 2.504651  |
| C                       | -0.019808 | -1.503026 | -1.039814          | H | -0.108665 | 1.172553  | -2.504651 |
| C                       | 1.035630  | -2.016292 | 0.000000           | H | -0.234416 | 3.309242  | -1.232016 |
| C                       | -1.086494 | -2.010558 | 0.000000           |   |           |           |           |



| <b>5-Na<sup>+</sup></b> |           |           | PG: C <sub>s</sub> | <b>5-K<sup>+</sup></b> |           |           | PG: C <sub>s</sub> |
|-------------------------|-----------|-----------|--------------------|------------------------|-----------|-----------|--------------------|
| Na                      | -2.085887 | -1.178548 | 0.000000           | K                      | -2.277376 | -1.111358 | 0.000000           |
| C                       | 0.277555  | 0.152705  | 0.708452           | C                      | 0.563508  | 0.267223  | 0.707107           |
| C                       | 0.271983  | -1.031104 | 1.422257           | C                      | 0.560438  | -0.914736 | 1.420477           |
| C                       | 0.271983  | -2.244381 | 0.696703           | C                      | 0.560438  | -2.125940 | 0.695789           |
| C                       | 0.271983  | -2.244381 | -0.696703          | C                      | 0.560438  | -2.125940 | -0.695789          |
| C                       | 0.271983  | -1.031104 | -1.422257          | C                      | 0.560438  | -0.914736 | -1.420477          |
| C                       | 0.277555  | 0.152705  | -0.708452          | C                      | 0.563508  | 0.267223  | -0.707107          |
| C                       | 0.368487  | 1.628839  | 1.038616           | C                      | 0.660312  | 1.744209  | 1.037852           |
| C                       | 0.368487  | 1.628839  | -1.038616          | C                      | 0.660312  | 1.744209  | -1.037852          |
| C                       | -0.645475 | 2.219658  | 0.000000           | C                      | -0.350808 | 2.340972  | 0.000000           |
| C                       | 1.468518  | 2.059802  | 0.000000           | C                      | 1.761890  | 2.172488  | 0.000000           |
| H                       | -0.658021 | 3.306490  | 0.000000           | H                      | -0.357315 | 3.428062  | 0.000000           |
| H                       | -1.670767 | 1.839882  | 0.000000           | H                      | -1.377849 | 1.966826  | 0.000000           |
| H                       | 1.640552  | 3.133180  | 0.000000           | H                      | 1.938841  | 3.245318  | 0.000000           |
| H                       | 2.409756  | 1.515833  | 0.000000           | H                      | 2.699969  | 1.623204  | 0.000000           |
| H                       | 0.391159  | 1.937237  | -2.077543          | H                      | 0.684518  | 2.053730  | -2.076641          |
| H                       | 0.391159  | 1.937237  | 2.077543           | H                      | 0.684518  | 2.053730  | 2.076641           |
| H                       | 0.304872  | -3.183969 | 1.230833           | H                      | 0.598020  | -3.065723 | 1.229951           |
| H                       | 0.306412  | -1.043679 | 2.503538           | H                      | 0.599296  | -0.926723 | 2.501882           |
| H                       | 0.306412  | -1.043679 | -2.503538          | H                      | 0.599296  | -0.926723 | -2.501882          |
| H                       | 0.304872  | -3.183969 | -1.230833          | H                      | 0.598020  | -3.065723 | -1.229951          |

| <b>6</b> |           |           | PG: C <sub>2v</sub> |   |           |           |           |
|----------|-----------|-----------|---------------------|---|-----------|-----------|-----------|
| C        | 0.000000  | 1.369926  | 0.884751            |   |           |           |           |
| C        | 0.000000  | 0.710423  | 2.087351            |   |           |           |           |
| C        | 0.000000  | -0.710423 | 2.087351            |   |           |           |           |
| C        | 0.000000  | -1.369926 | 0.884751            |   |           |           |           |
| C        | 0.000000  | -0.681133 | -0.359410           |   |           |           |           |
| C        | 0.000000  | 0.681133  | -0.359410           | C | -1.062259 | -2.770131 | -0.709568 |
| C        | 0.000000  | 2.822803  | 0.443592            | C | 1.062259  | -2.770131 | -0.709568 |
| C        | 0.000000  | 1.819268  | -1.364922           | H | -1.157112 | -3.718538 | -1.237616 |
| C        | -1.062259 | 2.770131  | -0.709568           | H | -2.041256 | -2.354295 | -0.478140 |
| C        | 1.062259  | 2.770131  | -0.709568           | H | 1.157112  | -3.718538 | -1.237616 |
| H        | -1.157112 | 3.718538  | -1.237616           | H | 2.041256  | -2.354295 | -0.478140 |
| H        | -2.041256 | 2.354295  | -0.478140           | H | 0.000000  | -3.602629 | 1.198875  |
| H        | 1.157112  | 3.718538  | -1.237616           | H | 0.000000  | -1.591035 | -2.426039 |
| H        | 2.041256  | 2.354295  | -0.478140           | H | 0.000000  | -1.250116 | 3.025329  |
| H        | 0.000000  | 1.591035  | -2.426039           | H | 0.000000  | 1.250116  | 3.025329  |
| H        | 0.000000  | 3.602629  | 1.198875            |   |           |           |           |
| C        | 0.000000  | -1.819268 | -1.364922           |   |           |           |           |
| C        | 0.000000  | -2.822803 | 0.443592            |   |           |           |           |

| <b>6-Li<sup>+</sup></b> |           |                    | <b>6-Na<sup>+</sup></b> |    |                    |           |           |
|-------------------------|-----------|--------------------|-------------------------|----|--------------------|-----------|-----------|
|                         |           | PG: C <sub>s</sub> |                         |    | PG: C <sub>s</sub> |           |           |
| Li                      | -1.082445 | 1.694954           | 0.000000                | Na | -1.743069          | 1.571639  | 0.000000  |
| C                       | -0.855373 | -0.072734          | 1.383633                | C  | -0.637716          | -0.487253 | 1.380311  |
| C                       | -2.059301 | -0.173847          | 0.715299                | C  | -1.730540          | -0.999404 | 0.714903  |
| C                       | -2.059301 | -0.173847          | -0.715299               | C  | -1.730540          | -0.999404 | -0.714903 |
| C                       | -0.855373 | -0.072734          | -1.383633               | C  | -0.637716          | -0.487253 | -1.380311 |
| C                       | 0.392185  | 0.037361           | -0.685963               | C  | 0.495263           | 0.043735  | -0.684511 |
| C                       | 0.392185  | 0.037361           | 0.685963                | C  | 0.495263           | 0.043735  | 0.684511  |
| C                       | -0.409440 | -0.103956          | 2.831399                | C  | -0.201432          | -0.380396 | 2.828343  |
| C                       | 1.399183  | 0.052509           | 1.818169                | C  | 1.443542           | 0.386205  | 1.817421  |
| C                       | 0.685276  | 1.017602           | 2.825767                | C  | 0.451671           | 1.044154  | 2.835981  |
| C                       | 0.803764  | -1.097305          | 2.710949                | C  | 1.275888           | -0.902968 | 2.701086  |
| H                       | 1.211167  | 1.086645           | 3.774307                | H  | 0.924700           | 1.282232  | 3.785304  |
| H                       | 0.406859  | 2.015659           | 2.481444                | H  | -0.148380          | 1.894937  | 2.500939  |
| H                       | 1.339991  | -1.208164          | 3.649805                | H  | 1.821573           | -0.836171 | 3.639197  |
| H                       | 0.627369  | -2.065095          | 2.247935                | H  | 1.434365           | -1.868942 | 2.228099  |
| H                       | 2.454681  | 0.126568           | 1.584720                | H  | 2.412112           | 0.814405  | 1.586828  |
| H                       | -1.159740 | -0.186893          | 3.609091                | H  | -0.874791          | -0.719080 | 3.607578  |
| C                       | 1.399183  | 0.052509           | -1.818169               | C  | 1.443542           | 0.386205  | -1.817421 |
| C                       | -0.409440 | -0.103956          | -2.831399               | C  | -0.201432          | -0.380396 | -2.828343 |
| C                       | 0.685276  | 1.017602           | -2.825767               | C  | 0.451671           | 1.044154  | -2.835981 |
| C                       | 0.803764  | -1.097305          | -2.710949               | C  | 1.275888           | -0.902968 | -2.701086 |
| H                       | 1.211167  | 1.086645           | -3.774307               | H  | 0.924700           | 1.282232  | -3.785304 |
| H                       | 0.406859  | 2.015659           | -2.481444               | H  | -0.148380          | 1.894937  | -2.500939 |
| H                       | 1.339991  | -1.208164          | -3.649805               | H  | 1.821573           | -0.836171 | -3.639197 |
| H                       | 0.627369  | -2.065095          | -2.247935               | H  | 1.434365           | -1.868942 | -2.228099 |
| H                       | -1.159740 | -0.186893          | -3.609091               | H  | -0.874791          | -0.719080 | -3.607578 |
| H                       | 2.454681  | 0.126568           | -1.584720               | H  | 2.412112           | 0.814405  | -1.586828 |
| H                       | -2.994430 | -0.268938          | -1.249891               | H  | -2.562761          | -1.435835 | -1.250895 |
| H                       | -2.994430 | -0.268938          | 1.249891                | H  | -2.562761          | -1.435835 | 1.250895  |

| <b>6-K<sup>+</sup></b> |           |                    |           | <b>7</b> |           |                     |           |
|------------------------|-----------|--------------------|-----------|----------|-----------|---------------------|-----------|
|                        |           | PG: C <sub>s</sub> |           |          |           | PG: D <sub>3h</sub> |           |
| K                      | 2.450327  | -0.814985          | 0.000000  | C        | -0.678964 | 1.221701            | 0.000000  |
| C                      | 0.142290  | 0.798416           | 1.377421  | C        | 0.678964  | 1.221701            | 0.000000  |
| C                      | 0.895975  | 1.739587           | 0.713509  | C        | 1.397506  | -0.022851           | 0.000000  |
| C                      | 0.895975  | 1.739587           | -0.713509 | C        | 0.718542  | -1.198850           | 0.000000  |
| C                      | 0.142290  | 0.798416           | -1.377421 | C        | -0.718542 | -1.198850           | 0.000000  |
| C                      | -0.640657 | -0.174800          | -0.683654 | C        | -1.397506 | -0.022851           | 0.000000  |
| C                      | -0.640657 | -0.174800          | 0.683654  | C        | -1.806351 | 2.238144            | 0.000000  |
| C                      | -0.209732 | 0.517033           | 2.826346  | C        | -2.841466 | 0.445274            | 0.000000  |
| C                      | -1.348733 | -0.894480          | 1.816530  | C        | -2.767554 | 1.597848            | 1.062040  |
| C                      | -0.174779 | -1.049280          | 2.842251  | C        | -2.767554 | 1.597848            | -1.062040 |
| C                      | -1.766190 | 0.340617           | 2.694859  | H        | -3.707659 | 2.140618            | 1.157178  |
| H                      | -0.500992 | -1.466310          | 3.791905  | H        | -2.355243 | 1.359800            | 2.041012  |
| H                      | 0.737833  | -1.554541          | 2.514447  | H        | -3.707659 | 2.140618            | -1.157178 |
| H                      | -2.232678 | 0.045643           | 3.632012  | H        | -2.355243 | 1.359800            | -2.041012 |
| H                      | -2.328020 | 1.138326           | 2.215338  | H        | -3.637729 | -0.291942           | 0.000000  |
| H                      | -2.032270 | -1.704011          | 1.587214  | H        | -1.566035 | 3.296336            | 0.000000  |
| H                      | 0.243327  | 1.119146           | 3.606175  | C        | 2.841466  | 0.445274            | 0.000000  |
| C                      | -1.348733 | -0.894480          | -1.816530 | C        | 1.806351  | 2.238144            | 0.000000  |
| C                      | -0.209732 | 0.517033           | -2.826346 | C        | 2.767554  | 1.597848            | 1.062040  |
| C                      | -0.174779 | -1.049280          | -2.842251 | C        | 2.767554  | 1.597848            | -1.062040 |
| C                      | -1.766190 | 0.340617           | -2.694859 | H        | 3.707659  | 2.140618            | 1.157178  |
| H                      | -0.500992 | -1.466310          | -3.791905 | H        | 2.355243  | 1.359800            | 2.041012  |
| H                      | 0.737833  | -1.554541          | -2.514447 | H        | 3.707659  | 2.140618            | -1.157178 |
| H                      | -2.232678 | 0.045643           | -3.632012 | H        | 2.355243  | 1.359800            | -2.041012 |
| H                      | -2.328020 | 1.138326           | -2.215338 | H        | 1.566035  | 3.296336            | 0.000000  |
| H                      | 0.243327  | 1.119146           | -3.606175 | H        | 3.637729  | -0.291942           | 0.000000  |
| H                      | -2.032270 | -1.704011          | -1.587214 | C        | -1.035114 | -2.683418           | 0.000000  |
| H                      | 1.445644  | 2.501555           | -1.250519 | C        | 1.035114  | -2.683418           | 0.000000  |
| H                      | 1.445644  | 2.501555           | 1.250519  | C        | 0.000000  | -3.195696           | 1.062040  |
|                        |           |                    |           | C        | 0.000000  | -3.195696           | -1.062040 |
|                        |           |                    |           | H        | 0.000000  | -4.281236           | 1.157178  |
|                        |           |                    |           | H        | 0.000000  | -2.719601           | 2.041012  |
|                        |           |                    |           | H        | 0.000000  | -4.281236           | -1.157178 |
|                        |           |                    |           | H        | 0.000000  | -2.719601           | -2.041012 |
|                        |           |                    |           | H        | 2.071693  | -3.004395           | 0.000000  |
|                        |           |                    |           | H        | -2.071693 | -3.004395           | 0.000000  |

| <b>7-Li<sup>+</sup></b> |           |                     |           | <b>7-Na<sup>+</sup></b> |           |                     |           |
|-------------------------|-----------|---------------------|-----------|-------------------------|-----------|---------------------|-----------|
|                         |           | PG: C <sub>3v</sub> |           |                         |           | PG: C <sub>3v</sub> |           |
| Li                      | 0.000000  | 0.000000            | 1.787481  | Na                      | 0.000000  | 0.000000            | 2.212837  |
| C                       | -0.684131 | 1.231906            | 0.033297  | C                       | -0.682444 | 1.230333            | -0.095213 |
| C                       | 0.684131  | 1.231906            | 0.033297  | C                       | 0.682444  | 1.230333            | -0.095213 |
| C                       | 1.408928  | -0.023478           | 0.033297  | C                       | 1.406722  | -0.024152           | -0.095213 |
| C                       | 0.724796  | -1.208428           | 0.033297  | C                       | 0.724278  | -1.206181           | -0.095213 |
| C                       | -0.724796 | -1.208428           | 0.033297  | C                       | -0.724278 | -1.206181           | -0.095213 |
| C                       | -1.408928 | -0.023478           | 0.033297  | C                       | -1.406722 | -0.024152           | -0.095213 |
| C                       | -1.809682 | 2.244522            | -0.048725 | C                       | -1.807059 | 2.242643            | -0.202861 |
| C                       | -2.848655 | 0.444970            | -0.048725 | C                       | -2.845715 | 0.443638            | -0.202861 |
| C                       | -2.831523 | 1.634781            | 0.970401  | C                       | -2.845489 | 1.642844            | 0.805292  |
| C                       | -2.704346 | 1.561355            | -1.144520 | C                       | -2.688354 | 1.552122            | -1.304625 |
| H                       | -3.772687 | 2.178162            | 0.988252  | H                       | -3.786953 | 2.186398            | 0.807578  |
| H                       | -2.495584 | 1.440826            | 1.991219  | H                       | -2.525742 | 1.458238            | 1.834907  |
| H                       | -3.634824 | 2.098567            | -1.309981 | H                       | -3.616504 | 2.087989            | -1.488550 |
| H                       | -2.239340 | 1.292884            | -2.090062 | H                       | -2.208448 | 1.275048            | -2.239948 |
| H                       | -3.639857 | -0.295150           | -0.068530 | H                       | -3.639115 | -0.294584           | -0.227413 |
| H                       | -1.564321 | 3.299784            | -0.068530 | H                       | -1.564440 | 3.298858            | -0.227413 |
| C                       | 2.848655  | 0.444970            | -0.048725 | C                       | 2.845715  | 0.443638            | -0.202861 |
| C                       | 1.809682  | 2.244522            | -0.048725 | C                       | 1.807059  | 2.242643            | -0.202861 |
| C                       | 2.831523  | 1.634781            | 0.970401  | C                       | 2.845489  | 1.642844            | 0.805292  |
| C                       | 2.704346  | 1.561355            | -1.144520 | C                       | 2.688354  | 1.552122            | -1.304625 |
| H                       | 3.772687  | 2.178162            | 0.988252  | H                       | 3.786953  | 2.186398            | 0.807578  |
| H                       | 2.495584  | 1.440826            | 1.991219  | H                       | 2.525742  | 1.458238            | 1.834907  |
| H                       | 3.634824  | 2.098567            | -1.309981 | H                       | 3.616504  | 2.087989            | -1.488550 |
| H                       | 2.239340  | 1.292884            | -2.090062 | H                       | 2.208448  | 1.275048            | -2.239948 |
| H                       | 1.564321  | 3.299784            | -0.068530 | H                       | 1.564440  | 3.298858            | -0.227413 |
| H                       | 3.639857  | -0.295150           | -0.068530 | H                       | 3.639115  | -0.294584           | -0.227413 |
| C                       | -1.038972 | -2.689492           | -0.048725 | C                       | -1.038656 | -2.686280           | -0.202861 |
| C                       | 1.038972  | -2.689492           | -0.048725 | C                       | 1.038656  | -2.686280           | -0.202861 |
| C                       | 0.000000  | -3.269561           | 0.970401  | C                       | 0.000000  | -3.285687           | 0.805292  |
| C                       | 0.000000  | -3.122709           | -1.144520 | C                       | 0.000000  | -3.104244           | -1.304625 |
| H                       | 0.000000  | -4.356324           | 0.988252  | H                       | 0.000000  | -4.372797           | 0.807578  |
| H                       | 0.000000  | -2.881652           | 1.991219  | H                       | 0.000000  | -2.916476           | 1.834907  |
| H                       | 0.000000  | -4.197133           | -1.309981 | H                       | 0.000000  | -4.175979           | -1.488550 |
| H                       | 0.000000  | -2.585767           | -2.090062 | H                       | 0.000000  | -2.550096           | -2.239948 |
| H                       | 2.075536  | -3.004633           | -0.068530 | H                       | 2.074675  | -3.004274           | -0.227413 |
| H                       | -2.075536 | -3.004633           | -0.068530 | H                       | -2.074675 | -3.004274           | -0.227413 |

|   | 7-K <sup>+</sup> | PG: C <sub>3v</sub> |           |
|---|------------------|---------------------|-----------|
| K | 0.000000         | 0.000000            | 2.512213  |
| C | -0.681574        | 1.227899            | -0.268578 |
| C | 0.681574         | 1.227899            | -0.268578 |
| C | 1.404179         | -0.023689           | -0.268578 |
| C | 0.722604         | -1.204210           | -0.268578 |
| C | -0.722604        | -1.204210           | -0.268578 |
| C | -1.404179        | -0.023689           | -0.268578 |
| C | -1.805739        | 2.241134            | -0.389979 |
| C | -2.843749        | 0.443249            | -0.389979 |
| C | -2.854425        | 1.648003            | 0.611484  |
| C | -2.678377        | 1.546362            | -1.495496 |
| H | -3.796072        | 2.191663            | 0.600379  |
| H | -2.547617        | 1.470868            | 1.646074  |
| H | -3.604992        | 2.081343            | -1.691267 |
| H | -2.189078        | 1.263865            | -2.424329 |
| H | -3.637406        | -0.294946           | -0.417393 |
| H | -1.563273        | 3.297559            | -0.417393 |
| C | 2.843749         | 0.443249            | -0.389979 |
| C | 1.805739         | 2.241134            | -0.389979 |
| C | 2.854425         | 1.648003            | 0.611484  |
| C | 2.678377         | 1.546362            | -1.495496 |
| H | 3.796072         | 2.191663            | 0.600379  |
| H | 2.547617         | 1.470868            | 1.646074  |
| H | 3.604992         | 2.081343            | -1.691267 |
| H | 2.189078         | 1.263865            | -2.424329 |
| H | 1.563273         | 3.297559            | -0.417393 |
| H | 3.637406         | -0.294946           | -0.417393 |
| C | -1.038010        | -2.684383           | -0.389979 |
| C | 1.038010         | -2.684383           | -0.389979 |
| C | 0.000000         | -3.296006           | 0.611484  |
| C | 0.000000         | -3.092724           | -1.495496 |
| H | 0.000000         | -4.383327           | 0.600379  |
| H | 0.000000         | -2.941735           | 1.646074  |
| H | 0.000000         | -4.162686           | -1.691267 |
| H | 0.000000         | -2.527730           | -2.424329 |
| H | 2.074134         | -3.002614           | -0.417393 |
| H | -2.074134        | -3.002614           | -0.417393 |

**Table S2:** Total energies, BSSE corrections, and zero-point vibrational energy (ZPVE) corrections, obtained at the B3LYP/6-311+G(2d,2p) level. All values are in hartrees.<sup>a</sup>

| System   |                 | Ligand     | Ligand-Li <sup>+</sup> | Ligand-Na <sup>+</sup> | Ligand-K <sup>+</sup> |
|----------|-----------------|------------|------------------------|------------------------|-----------------------|
| <b>1</b> | Energy          | -232.32067 | -239.66742             | -394.44707             | -832.10767            |
|          | BSSE correction |            | 0.00062                | 0.00065                | 0.00038               |
|          | ZPVE            | 0.10033    | 0.10318                | 0.10180                | 0.10151               |
| <b>2</b> | Energy          | -386.00394 | -393.35480             | -548.13388             | -985.79422            |
|          | BSSE correction |            | 0.00064                | 0.00119                | 0.0005                |
|          | ZPVE            | 0.14714    | 0.14990                | 0.14847                | 0.14820               |
| <b>3</b> | Energy          | -539.68916 | -547.04153             | -701.82132             | -1139.48177           |
|          | BSSE correction |            | 0.00064                | 0.00116                | 0.0005                |
|          | ZPVE            | 0.19399    | 0.19656                | 0.19523                | 0.19500               |
| <b>4</b> | Energy          | -693.37104 | -700.72383             | -855.50492             | -1293.16545           |
|          | BSSE correction |            | 0.00068                | 0.00124                | 0.00053               |
|          | ZPVE            | 0.24107    | 0.24341                | 0.24220                | 0.24194               |
| <b>5</b> | Energy          | -387.14271 | -394.49996             | -549.27648             | -986.93511            |
|          | BSSE correction |            | 0.00059                | 0.00117                | 0.00044               |
|          | ZPVE            | 0.17017    | 0.17319                | 0.17163                | 0.17132               |
| <b>6</b> | Energy          | -541.96441 | -549.33000             | -704.10396             | -1141.76090           |
|          | BSSE correction |            | 0.00061                | 0.00123                | 0.00052               |
|          | ZPVE            | 0.23990    | 0.24307                | 0.24136                | 0.24100               |
| <b>7</b> | Energy          | -696.78598 | -704.158337            | -858.93002             | -1296.58545           |
|          | BSSE correction |            | 0.00066                | 0.00129                | 0.00052               |
|          | ZPVE            | 0.30967    | 0.31297                | 0.31109                | 0.31074               |

(a) Energies of metal ions:  $E_{\text{Li}^+} = -7.28492$ ;  $E_{\text{Na}^+} = -162.08757$ ;  $E_{\text{K}^+} = -599.76105$  hartrees

**Table S3:** B3LYP/6-311+G(2d,2p) level unscaled vibrational frequencies (in  $\text{cm}^{-1}$ ) for ligands **1-7** and their complexes with the alkali metal ions. The intensities (in  $\text{km/mol}$ ) are given in parentheses.

| No. | <b>1</b>  | <b>1-Li<sup>+</sup></b> | <b>1-Na<sup>+</sup></b> | <b>1-K<sup>+</sup></b> |
|-----|-----------|-------------------------|-------------------------|------------------------|
| 1   | 410 (0)   | 270 (11)                | 115 (2)                 | 97 (0)                 |
| 2   | 410 (0)   | 270 (11)                | 115 (2)                 | 97 (0)                 |
| 3   | 624 (0)   | 383 (101)               | 194 (35)                | 131 (23)               |
| 4   | 624 (0)   | 416 (0)                 | 417 (0)                 | 414 (0)                |
| 5   | 683 (115) | 416 (0)                 | 417 (0)                 | 414 (0)                |
| 6   | 717 (0)   | 623 (0)                 | 622 (0)                 | 622 (0)                |
| 7   | 861 (0)   | 623 (0)                 | 622 (0)                 | 622 (0)                |
| 8   | 861 (0)   | 713 (0)                 | 717 (0)                 | 715 (0)                |
| 9   | 989 (0)   | 752 (144)               | 736 (126)               | 725 (122)              |
| 10  | 989 (0)   | 918 (1)                 | 904 (1)                 | 896 (1)                |
| 11  | 1012 (0)  | 918 (1)                 | 904 (1)                 | 896 (1)                |
| 12  | 1016 (0)  | 997 (1)                 | 998 (2)                 | 1002 (2)               |
| 13  | 1031 (0)  | 1031 (0)                | 1021 (0)                | 1016 (0)               |
| 14  | 1060 (5)  | 1031 (0)                | 1021 (0)                | 1016 (0)               |
| 15  | 1060 (5)  | 1035 (0)                | 1027 (0)                | 1024 (0)               |
| 16  | 1176 (0)  | 1051 (3)                | 1048 (0)                | 1045 (0)               |
| 17  | 1200 (0)  | 1051 (3)                | 1052 (4)                | 1055 (4)               |
| 18  | 1200 (0)  | 1054 (0)                | 1052 (4)                | 1055 (4)               |
| 19  | 1332 (0)  | 1187 (0)                | 1182 (0)                | 1181 (0)               |
| 20  | 1391 (0)  | 1204 (0)                | 1203 (0)                | 1203 (0)               |
| 21  | 1519 (7)  | 1204 (0)                | 1203 (0)                | 1203 (0)               |
| 22  | 1519 (7)  | 1316 (0)                | 1316 (0)                | 1324 (0)               |
| 23  | 1634 (0)  | 1393 (0)                | 1394 (0)                | 1394 (0)               |
| 24  | 1634 (0)  | 1510 (19)               | 1512 (15)               | 1515 (13)              |
| 25  | 3164 (0)  | 1510 (19)               | 1512 (15)               | 1515 (13)              |
| 26  | 3173 (0)  | 1608 (0)                | 1615 (0)                | 1620 (0)               |
| 27  | 3173 (0)  | 1608 (0)                | 1615 (0)                | 1620 (0)               |
| 28  | 3188 (35) | 3188 (0)                | 3180 (0)                | 3176 (0)               |
| 29  | 3188 (35) | 3195 (0)                | 3187 (0)                | 3184 (0)               |
| 30  | 3199 (0)  | 3195 (0)                | 3187 (0)                | 3184 (0)               |
| 31  |           | 3205 (4)                | 3198 (0)                | 3196 (1)               |
| 32  |           | 3205 (4)                | 3198 (0)                | 3196 (1)               |
| 33  |           | 3211 (0)                | 3205 (0)                | 3204 (0)               |

| No. | 2         | 2-Li <sup>+</sup> | 2-Na <sup>+</sup> | 2-K <sup>+</sup> |
|-----|-----------|-------------------|-------------------|------------------|
| 1   | 172 (3)   | 153 (10)          | 70 (8)            | 49 (4)           |
| 2   | 185 (0)   | 164 (6)           | 90 (4)            | 74 (1)           |
| 3   | 366 (2)   | 262 (15)          | 185 (1)           | 132 (22)         |
| 4   | 396 (0)   | 277 (8)           | 193 (0)           | 188 (8)          |
| 5   | 478 (0)   | 366 (2)           | 197 (41)          | 193 (0)          |
| 6   | 488 (22)  | 385 (63)          | 365 (1)           | 365 (1)          |
| 7   | 520 (0)   | 405 (32)          | 396 (0)           | 396 (0)          |
| 8   | 520 (0)   | 475 (0)           | 476 (0)           | 476 (0)          |
| 9   | 635 (0)   | 502 (42)          | 496 (25)          | 496 (24)         |
| 10  | 637 (3)   | 519 (0)           | 518 (0)           | 518 (0)          |
| 11  | 728 (0)   | 520 (0)           | 518 (0)           | 518 (0)          |
| 12  | 773 (0)   | 630 (0)           | 632 (0)           | 633 (0)          |
| 13  | 786 (0)   | 634 (2)           | 633 (2)           | 634 (2)          |
| 14  | 798 (119) | 763 (3)           | 757 (2)           | 753 (1)          |
| 15  | 811 (0)   | 765 (1)           | 765 (0)           | 766 (0)          |
| 16  | 851 (0)   | 787 (0)           | 786 (0)           | 787 (0)          |
| 17  | 900 (0)   | 808 (0)           | 807 (0)           | 807 (0)          |
| 18  | 956 (0)   | 837 (127)         | 827 (123)         | 822 (120)        |
| 19  | 966 (0)   | 883 (0)           | 875 (0)           | 873 (0)          |
| 20  | 987 (4)   | 928 (1)           | 918 (1)           | 916 (1)          |
| 21  | 999 (0)   | 957 (0)           | 954 (0)           | 954 (0)          |
| 22  | 1004 (0)  | 996 (0)           | 989 (1)           | 987 (1)          |
| 23  | 1033 (9)  | 1013 (4)          | 1007 (4)          | 1004 (4)         |
| 24  | 1044 (0)  | 1025 (0)          | 1018 (0)          | 1017 (0)         |
| 25  | 1154 (5)  | 1027 (3)          | 1026 (5)          | 1025 (0)         |
| 26  | 1168 (1)  | 1034 (0)          | 1029 (0)          | 1029 (5)         |
| 27  | 1173 (0)  | 1040 (0)          | 1042 (0)          | 1042 (0)         |
| 28  | 1188 (0)  | 1155 (3)          | 1154 (4)          | 1155 (4)         |
| 29  | 1231 (1)  | 1178 (0)          | 1173 (0)          | 1173 (0)         |
| 30  | 1274 (0)  | 1179 (0)          | 1176 (0)          | 1176 (0)         |
| 31  | 1291 (6)  | 1197 (1)          | 1195 (0)          | 1194 (0)         |
| 32  | 1389 (1)  | 1231 (1)          | 1230 (1)          | 1231 (1)         |
| 33  | 1391 (0)  | 1274 (0)          | 1274 (0)          | 1275 (0)         |
| 34  | 1426 (4)  | 1291 (10)         | 1290 (9)          | 1291 (9)         |
| 35  | 1495 (0)  | 1368 (8)          | 1372 (4)          | 1379 (3)         |
| 36  | 1497 (0)  | 1395 (27)         | 1389 (15)         | 1389 (9)         |
| 37  | 1549 (8)  | 1426 (7)          | 1426 (6)          | 1427 (6)         |
| 38  | 1610 (0)  | 1489 (0)          | 1490 (0)          | 1491 (0)         |
| 39  | 1637 (3)  | 1494 (1)          | 1494 (1)          | 1496 (0)         |
| 40  | 1665 (0)  | 1536 (16)         | 1540 (15)         | 1543 (14)        |



|    |      |      |      |     |      |     |      |     |
|----|------|------|------|-----|------|-----|------|-----|
| 41 | 3163 | (0)  | 1596 | (2) | 1598 | (1) | 1601 | (1) |
| 42 | 3165 | (5)  | 1618 | (6) | 1624 | (6) | 1629 | (6) |
| 43 | 3167 | (1)  | 1653 | (3) | 1654 | (2) | 1656 | (1) |
| 44 | 3171 | (0)  | 3184 | (0) | 3176 | (0) | 3172 | (0) |
| 45 | 3181 | (0)  | 3186 | (0) | 3179 | (0) | 3175 | (0) |
| 46 | 3182 | (51) | 3186 | (0) | 3181 | (1) | 3178 | (1) |
| 47 | 3193 | (37) | 3190 | (0) | 3184 | (0) | 3181 | (0) |
| 48 | 3194 | (0)  | 3199 | (0) | 3192 | (1) | 3188 | (2) |
| 49 |      |      | 3201 | (1) | 3197 | (2) | 3195 | (4) |
| 50 |      |      | 3208 | (2) | 3202 | (0) | 3199 | (1) |
| 51 |      |      | 3210 | (0) | 3208 | (0) | 3206 | (1) |

| No. | <b>3</b> | <b>3-Li<sup>+</sup></b> | <b>3-Na<sup>+</sup></b> | <b>3-K<sup>+</sup></b> |     |      |     |      |
|-----|----------|-------------------------|-------------------------|------------------------|-----|------|-----|------|
| 1   | 96       | (0)                     | 96                      | (2)                    | 57  | (9)  | 37  | (5)  |
| 2   | 100      | (1)                     | 99                      | (0)                    | 76  | (8)  | 55  | (3)  |
| 3   | 228      | (4)                     | 183                     | (13)                   | 95  | (0)  | 90  | (2)  |
| 4   | 242      | (0)                     | 188                     | (16)                   | 99  | (0)  | 97  | (0)  |
| 5   | 248      | (0)                     | 245                     | (1)                    | 194 | (38) | 140 | (26) |
| 6   | 400      | (0)                     | 267                     | (4)                    | 234 | (8)  | 236 | (7)  |
| 7   | 412      | (1)                     | 283                     | (15)                   | 244 | (0)  | 246 | (0)  |
| 8   | 436      | (8)                     | 379                     | (75)                   | 247 | (1)  | 247 | (1)  |
| 9   | 447      | (2)                     | 405                     | (1)                    | 403 | (1)  | 402 | (0)  |
| 10  | 506      | (1)                     | 411                     | (1)                    | 410 | (1)  | 411 | (1)  |
| 11  | 507      | (5)                     | 447                     | (1)                    | 438 | (11) | 438 | (10) |
| 12  | 544      | (0)                     | 448                     | (47)                   | 446 | (1)  | 446 | (1)  |
| 13  | 558      | (0)                     | 500                     | (13)                   | 501 | (6)  | 503 | (6)  |
| 14  | 602      | (0)                     | 503                     | (2)                    | 504 | (1)  | 505 | (1)  |
| 15  | 634      | (5)                     | 548                     | (1)                    | 547 | (1)  | 547 | (1)  |
| 16  | 724      | (0)                     | 556                     | (0)                    | 555 | (0)  | 556 | (0)  |
| 17  | 728      | (1)                     | 591                     | (1)                    | 594 | (0)  | 596 | (0)  |
| 18  | 728      | (2)                     | 631                     | (3)                    | 631 | (3)  | 632 | (3)  |
| 19  | 747      | (87)                    | 717                     | (0)                    | 717 | (0)  | 719 | (0)  |
| 20  | 769      | (0)                     | 724                     | (2)                    | 724 | (2)  | 725 | (2)  |
| 21  | 805      | (0)                     | 738                     | (10)                   | 735 | (7)  | 734 | (6)  |
| 22  | 829      | (55)                    | 767                     | (70)                   | 766 | (75) | 764 | (77) |
| 23  | 845      | (0)                     | 780                     | (0)                    | 780 | (0)  | 780 | (0)  |
| 24  | 885      | (12)                    | 805                     | (0)                    | 804 | (0)  | 805 | (0)  |
| 25  | 885      | (0)                     | 838                     | (1)                    | 839 | (0)  | 841 | (0)  |
| 26  | 890      | (2)                     | 859                     | (51)                   | 852 | (57) | 849 | (56) |
| 27  | 965      | (0)                     | 885                     | (0)                    | 884 | (0)  | 886 | (0)  |
| 28  | 973      | (3)                     | 894                     | (0)                    | 892 | (0)  | 891 | (0)  |
| 29  | 989      | (0)                     | 904                     | (18)                   | 902 | (12) | 900 | (12) |

---

|    |      |      |      |      |      |      |      |      |
|----|------|------|------|------|------|------|------|------|
| 30 | 1000 | (0)  | 990  | (0)  | 987  | (0)  | 983  | (0)  |
| 31 | 1002 | (0)  | 998  | (2)  | 995  | (2)  | 991  | (3)  |
| 32 | 1020 | (3)  | 1010 | (2)  | 1006 | (2)  | 1005 | (1)  |
| 33 | 1060 | (2)  | 1015 | (0)  | 1016 | (0)  | 1017 | (0)  |
| 34 | 1061 | (6)  | 1028 | (0)  | 1025 | (0)  | 1022 | (0)  |
| 35 | 1117 | (2)  | 1030 | (0)  | 1027 | (0)  | 1023 | (0)  |
| 36 | 1167 | (2)  | 1057 | (0)  | 1059 | (0)  | 1059 | (1)  |
| 37 | 1173 | (0)  | 1059 | (2)  | 1060 | (2)  | 1061 | (3)  |
| 38 | 1187 | (0)  | 1118 | (1)  | 1118 | (1)  | 1118 | (1)  |
| 39 | 1192 | (0)  | 1176 | (3)  | 1173 | (3)  | 1172 | (3)  |
| 40 | 1223 | (1)  | 1180 | (0)  | 1178 | (0)  | 1178 | (0)  |
| 41 | 1243 | (0)  | 1187 | (0)  | 1186 | (0)  | 1188 | (0)  |
| 42 | 1267 | (9)  | 1204 | (0)  | 1202 | (0)  | 1200 | (0)  |
| 43 | 1310 | (0)  | 1225 | (3)  | 1224 | (3)  | 1224 | (2)  |
| 44 | 1326 | (2)  | 1239 | (2)  | 1239 | (2)  | 1241 | (1)  |
| 45 | 1362 | (0)  | 1267 | (7)  | 1266 | (8)  | 1267 | (8)  |
| 46 | 1370 | (1)  | 1313 | (0)  | 1311 | (0)  | 1311 | (0)  |
| 47 | 1451 | (1)  | 1320 | (4)  | 1319 | (3)  | 1322 | (4)  |
| 48 | 1452 | (1)  | 1361 | (29) | 1357 | (13) | 1357 | (7)  |
| 49 | 1475 | (4)  | 1361 | (8)  | 1360 | (5)  | 1363 | (4)  |
| 50 | 1496 | (10) | 1442 | (1)  | 1443 | (0)  | 1446 | (1)  |
| 51 | 1537 | (6)  | 1450 | (1)  | 1451 | (1)  | 1452 | (1)  |
| 52 | 1563 | (2)  | 1472 | (7)  | 1472 | (6)  | 1473 | (6)  |
| 53 | 1605 | (0)  | 1495 | (28) | 1495 | (21) | 1495 | (19) |
| 54 | 1640 | (2)  | 1528 | (4)  | 1530 | (6)  | 1533 | (6)  |
| 55 | 1651 | (0)  | 1556 | (5)  | 1559 | (4)  | 1560 | (4)  |
| 56 | 1656 | (0)  | 1596 | (3)  | 1598 | (2)  | 1599 | (1)  |
| 57 | 3162 | (0)  | 1625 | (4)  | 1632 | (5)  | 1635 | (8)  |
| 58 | 3166 | (2)  | 1642 | (8)  | 1641 | (4)  | 1644 | (1)  |
| 59 | 3167 | (2)  | 1650 | (0)  | 1648 | (0)  | 1648 | (0)  |
| 60 | 3175 | (0)  | 3181 | (2)  | 3174 | (1)  | 3171 | (0)  |
| 61 | 3176 | (12) | 3185 | (1)  | 3180 | (1)  | 3178 | (1)  |
| 62 | 3182 | (32) | 3186 | (0)  | 3181 | (0)  | 3179 | (1)  |
| 63 | 3190 | (38) | 3194 | (0)  | 3189 | (1)  | 3187 | (3)  |
| 64 | 3192 | (1)  | 3195 | (0)  | 3191 | (0)  | 3188 | (0)  |
| 65 | 3200 | (9)  | 3196 | (1)  | 3193 | (2)  | 3191 | (3)  |
| 66 | 3213 | (17) | 3207 | (1)  | 3203 | (2)  | 3200 | (3)  |
| 67 |      |      | 3209 | (0)  | 3206 | (0)  | 3204 | (0)  |
| 68 |      |      | 3215 | (0)  | 3210 | (1)  | 3208 | (2)  |
| 69 |      |      | 3227 | (1)  | 3221 | (2)  | 3219 | (4)  |

---

| No. | 4         | 4-Li <sup>+</sup> | 4-Na <sup>+</sup> | 4-K <sup>+</sup> |
|-----|-----------|-------------------|-------------------|------------------|
| 1   | 53 (0)    | 57 (1)            | 49 (4)            | 36 (5)           |
| 2   | 53 (0)    | 57 (1)            | 49 (4)            | 36 (5)           |
| 3   | 111 (0)   | 114 (0)           | 69 (6)            | 58 (0)           |
| 4   | 121 (3)   | 119 (0)           | 69 (6)            | 58 (0)           |
| 5   | 262 (0)   | 188 (24)          | 110 (0)           | 95 (5)           |
| 6   | 262 (0)   | 188 (24)          | 112 (0)           | 113 (0)          |
| 7   | 272 (0)   | 260 (0)           | 197 (46)          | 153 (30)         |
| 8   | 272 (0)   | 260 (0)           | 260 (0)           | 261 (0)          |
| 9   | 411 (1)   | 280 (4)           | 260 (0)           | 261 (0)          |
| 10  | 411 (1)   | 280 (4)           | 272 (0)           | 272 (0)          |
| 11  | 421 (0)   | 364 (79)          | 272 (0)           | 272 (0)          |
| 12  | 431 (6)   | 410 (0)           | 410 (1)           | 410 (1)          |
| 13  | 434 (0)   | 410 (0)           | 410 (1)           | 410 (1)          |
| 14  | 434 (0)   | 418 (0)           | 418 (0)           | 419 (0)          |
| 15  | 553 (0)   | 439 (0)           | 434 (11)          | 433 (9)          |
| 16  | 553 (0)   | 439 (0)           | 436 (0)           | 437 (0)          |
| 17  | 568 (0)   | 447 (56)          | 436 (0)           | 437 (0)          |
| 18  | 582 (0)   | 548 (1)           | 545 (1)           | 543 (0)          |
| 19  | 621 (0)   | 548 (1)           | 545 (1)           | 543 (0)          |
| 20  | 638 (5)   | 565 (0)           | 567 (0)           | 567 (0)          |
| 21  | 638 (5)   | 567 (0)           | 570 (0)           | 573 (0)          |
| 22  | 713 (0)   | 618 (0)           | 619 (0)           | 619 (0)          |
| 23  | 726 (0)   | 635 (3)           | 635 (3)           | 636 (3)          |
| 24  | 726 (0)   | 635 (3)           | 635 (3)           | 636 (3)          |
| 25  | 752 (189) | 707 (0)           | 708 (0)           | 709 (0)          |
| 26  | 789 (0)   | 730 (0)           | 730 (0)           | 730 (0)          |
| 27  | 789 (0)   | 730 (0)           | 730 (0)           | 730 (0)          |
| 28  | 790 (0)   | 768 (168)         | 768 (176)         | 767 (179)        |
| 29  | 791 (0)   | 782 (0)           | 782 (0)           | 786 (0)          |
| 30  | 791 (0)   | 782 (0)           | 784 (0)           | 786 (0)          |
| 31  | 871 (0)   | 783 (0)           | 784 (0)           | 789 (0)          |
| 32  | 871 (0)   | 797 (1)           | 795 (1)           | 794 (1)          |
| 33  | 892 (0)   | 797 (1)           | 795 (1)           | 794 (1)          |
| 34  | 963 (0)   | 884 (0)           | 883 (0)           | 882 (0)          |
| 35  | 963 (0)   | 884 (0)           | 884 (0)           | 882 (0)          |
| 36  | 971 (1)   | 888 (0)           | 884 (0)           | 886 (0)          |
| 37  | 994 (0)   | 986 (0)           | 982 (0)           | 979 (0)          |
| 38  | 1000 (0)  | 986 (0)           | 982 (0)           | 979 (0)          |
| 39  | 1000 (0)  | 994 (0)           | 990 (1)           | 988 (1)          |
| 40  | 1019 (4)  | 1012 (0)          | 1014 (0)          | 1014 (0)         |
| 41  | 1019 (4)  | 1012 (0)          | 1014 (0)          | 1015 (0)         |
| 42  | 1029 (0)  | 1021 (0)          | 1017 (0)          | 1015 (0)         |

---

|    |            |           |           |           |
|----|------------|-----------|-----------|-----------|
| 43 | 1077 (6)   | 1026 (0)  | 1022 (0)  | 1020 (0)  |
| 44 | 1077 (6)   | 1026 (0)  | 1022 (0)  | 1020 (0)  |
| 45 | 1085 (0)   | 1026 (0)  | 1027 (0)  | 1028 (0)  |
| 46 | 1135 (0)   | 1074 (2)  | 1076 (3)  | 1076 (3)  |
| 47 | 1135 (0)   | 1074 (2)  | 1076 (3)  | 1076 (3)  |
| 48 | 1172 (0)   | 1081 (0)  | 1084 (0)  | 1084 (0)  |
| 49 | 1196 (0)   | 1135 (3)  | 1134 (2)  | 1134 (2)  |
| 50 | 1196 (0)   | 1135 (3)  | 1134 (2)  | 1134 (2)  |
| 51 | 1208 (0)   | 1181 (0)  | 1178 (0)  | 1176 (0)  |
| 52 | 1242 (0)   | 1206 (0)  | 1204 (0)  | 1203 (0)  |
| 53 | 1272 (5)   | 1206 (0)  | 1204 (0)  | 1203 (0)  |
| 54 | 1272 (5)   | 1214 (0)  | 1213 (0)  | 1212 (0)  |
| 55 | 1317 (0)   | 1239 (0)  | 1240 (0)  | 1241 (0)  |
| 56 | 1317 (0)   | 1272 (1)  | 1272 (2)  | 1272 (3)  |
| 57 | 1327 (0)   | 1272 (1)  | 1272 (2)  | 1272 (3)  |
| 58 | 1354 (0)   | 1310 (1)  | 1310 (0)  | 1312 (0)  |
| 59 | 1367 (0)   | 1310 (1)  | 1310 (0)  | 1312 (0)  |
| 60 | 1367 (0)   | 1329 (0)  | 1329 (0)  | 1328 (0)  |
| 61 | 1472 (20)  | 1339 (0)  | 1340 (0)  | 1345 (0)  |
| 62 | 1472 (20)  | 1363 (11) | 1361 (6)  | 1363 (4)  |
| 63 | 1479 (0)   | 1363 (11) | 1361 (6)  | 1363 (4)  |
| 64 | 1496 (0)   | 1471 (32) | 1471 (28) | 1472 (27) |
| 65 | 1536 (10)  | 1471 (32) | 1471 (28) | 1472 (27) |
| 66 | 1536 (10)  | 1472 (0)  | 1473 (0)  | 1475 (0)  |
| 67 | 1587 (0)   | 1496 (0)  | 1496 (0)  | 1496 (0)  |
| 68 | 1615 (0)   | 1529 (14) | 1531 (14) | 1533 (13) |
| 69 | 1615 (0)   | 1529 (14) | 1531 (14) | 1533 (13) |
| 70 | 1644 (0)   | 1581 (0)  | 1584 (0)  | 1584 (0)  |
| 71 | 1644 (0)   | 1605 (2)  | 1607 (2)  | 1609 (1)  |
| 72 | 1649 (0)   | 1605 (2)  | 1607 (2)  | 1609 (1)  |
| 73 | 3173 (0)   | 1642 (4)  | 1640 (2)  | 1640 (2)  |
| 74 | 3174 (2.1) | 1642 (4)  | 1640 (2)  | 1640 (2)  |
| 75 | 3174 (2)   | 1649 (0)  | 1648 (0)  | 1647 (0)  |
| 76 | 3188 (31)  | 3193 (0)  | 3190 (0)  | 3188 (0)  |
| 77 | 3188 (31)  | 3193 (0)  | 3191 (0)  | 3189 (0)  |
| 78 | 3190 (0)   | 3193 (0)  | 3191 (0)  | 3189 (0)  |
| 79 | 3208 (0)   | 3204 (1)  | 3202 (3)  | 3200 (4)  |
| 80 | 3210 (0)   | 3204 (1)  | 3202 (3)  | 3200 (4)  |
| 81 | 3210 (0.)  | 3206 (0)  | 3204 (0)  | 3202 (0)  |
| 82 | 3227 (29)  | 3221 (0)  | 3216 (0)  | 3214 (0)  |
| 83 | 3227 (29)  | 3223 (0)  | 3219 (0)  | 3217 (0)  |
| 84 | 3229 (0)   | 3223 (0)  | 3219 (0)  | 3217 (0)  |
| 85 |            | 3239 (3)  | 3235 (6)  | 3233 (8)  |

---

|    |          |          |          |
|----|----------|----------|----------|
| 86 | 3239 (3) | 3235 (6) | 3233 (8) |
| 87 | 3241 (0) | 3236 (0) | 3235 (0) |

| No. | 5         | 5-Li <sup>+</sup> | 5-Na <sup>+</sup> | 5-K <sup>+</sup> |
|-----|-----------|-------------------|-------------------|------------------|
| 1   | 151 (3)   | 152 (9)           | 84 (11)           | 63 (7)           |
| 2   | 214 (0)   | 193 (6)           | 98 (4)            | 79 (2)           |
| 3   | 366 (1)   | 278 (19)          | 173 (7)           | 143 (24)         |
| 4   | 387 (0)   | 291 (6)           | 207 (28)          | 175 (1)          |
| 5   | 444 (0)   | 370 (2)           | 224 (0)           | 222 (0)          |
| 6   | 545 (11)  | 397 (2)           | 368 (1)           | 368 (1)          |
| 7   | 579 (0)   | 407 (78)          | 393 (0)           | 392 (0)          |
| 8   | 591 (0)   | 447 (2)           | 446 (1)           | 446 (0)          |
| 9   | 593 (0)   | 569 (25)          | 560 (15)          | 557 (14)         |
| 10  | 752 (6)   | 586 (0)           | 586 (0)           | 585 (0)          |
| 11  | 760 (60)  | 593 (0)           | 592 (0)           | 592 (0)          |
| 12  | 776 (0)   | 594 (0)           | 593 (0)           | 593 (0)          |
| 13  | 806 (0)   | 748 (8)           | 748 (6)           | 749 (6)          |
| 14  | 809 (0)   | 775 (0)           | 775 (0)           | 776 (0)          |
| 15  | 835 (0)   | 803 (0)           | 801 (48)          | 795 (57)         |
| 16  | 872 (1)   | 808 (10)          | 802 (0)           | 802 (0)          |
| 17  | 887 (7)   | 823 (66)          | 813 (20)          | 811 (8)          |
| 18  | 893 (0)   | 843 (0)           | 841 (0)           | 841 (0)          |
| 19  | 946 (3)   | 876 (2)           | 875 (1)           | 875 (1)          |
| 20  | 994 (0)   | 887 (8)           | 886 (9)           | 886 (8)          |
| 21  | 1006 (2)  | 935 (1)           | 923 (1)           | 918 (1)          |
| 22  | 1011 (0)  | 980 (2)           | 969 (2)           | 966 (2)          |
| 23  | 1027 (6)  | 1001 (10)         | 1002 (9)          | 1003 (7)         |
| 24  | 1052 (4)  | 1012 (0)          | 1009 (0)          | 1008 (0)         |
| 25  | 1068 (8)  | 1019 (4)          | 1015 (0)          | 1012 (0)         |
| 26  | 1069 (0)  | 1025 (0)          | 1018 (5)          | 1021 (6)         |
| 27  | 1095 (0)  | 1059 (3)          | 1056 (4)          | 1055 (4)         |
| 28  | 1127 (0)  | 1060 (12)         | 1060 (11)         | 1061 (10)        |
| 29  | 1150 (6)  | 1065 (0)          | 1064 (0)          | 1063 (0)         |
| 30  | 1181 (0)  | 1099 (0)          | 1099 (0)          | 1098 (0)         |
| 31  | 1198 (1)  | 1126 (0)          | 1125 (0)          | 1127 (0)         |
| 32  | 1219 (4)  | 1166 (4)          | 1160 (5)          | 1157 (5)         |
| 33  | 1223 (3)  | 1186 (0)          | 1184 (0)          | 1184 (0)         |
| 34  | 1229 (0)  | 1199 (1)          | 1196 (1)          | 1197 (1)         |
| 35  | 1262 (0)  | 1218 (3)          | 1215 (3)          | 1214 (3)         |
| 36  | 1279 (13) | 1220 (10)         | 1222 (8)          | 1222 (8)         |
| 37  | 1334 (0)  | 1235 (0)          | 1234 (0)          | 1233 (0)         |
| 38  | 1387 (0)  | 1269 (2)          | 1268 (2)          | 1268 (1)         |

|    |           |           |           |           |
|----|-----------|-----------|-----------|-----------|
| 39 | 1480 (12) | 1283 (17) | 1283 (16) | 1282 (16) |
| 40 | 1491 (4)  | 1336 (1)  | 1336 (1)  | 1336 (1)  |
| 41 | 1493 (3)  | 1376 (3)  | 1376 (2)  | 1382 (2)  |
| 42 | 1528 (3)  | 1470 (22) | 1471 (19) | 1475 (18) |
| 43 | 1634 (0)  | 1478 (9)  | 1480 (7)  | 1485 (7)  |
| 44 | 1651 (0)  | 1500 (8)  | 1498 (7)  | 1496 (6)  |
| 45 | 3052 (56) | 1534 (3)  | 1534 (3)  | 1533 (3)  |
| 46 | 3059 (43) | 1604 (2)  | 1612 (1)  | 1619 (1)  |
| 47 | 3114 (23) | 1618 (0)  | 1627 (0)  | 1633 (0)  |
| 48 | 3118 (39) | 3039 (51) | 3019 (81) | 3021 (91) |
| 49 | 3125 (66) | 3085 (12) | 3083 (14) | 3081 (16) |
| 50 | 3126 (27) | 3135 (9)  | 3128 (12) | 3125 (15) |
| 51 | 3163 (4)  | 3151 (6)  | 3147 (8)  | 3145 (6)  |
| 52 | 3170 (3)  | 3156 (16) | 3151 (22) | 3147 (27) |
| 53 | 3179 (31) | 3156 (6)  | 3151 (9)  | 3148 (14) |
| 54 | 3191 (21) | 3187 (0)  | 3179 (0)  | 3173 (1)  |
| 55 |           | 3190 (0)  | 3183 (0)  | 3178 (0)  |
| 56 |           | 3198 (0)  | 3191 (0)  | 3186 (3)  |
| 57 |           | 3207 (1)  | 3201 (0)  | 3196 (2)  |

| No. | <b>6</b> | <b>6-Li<sup>+</sup></b> | <b>6-Na<sup>+</sup></b> | <b>6-K<sup>+</sup></b> |
|-----|----------|-------------------------|-------------------------|------------------------|
| 1   | 96 (2)   | 103 (1)                 | 81 (8)                  | 65 (6)                 |
| 2   | 140 (0)  | 141 (2)                 | 82 (11)                 | 66 (6)                 |
| 3   | 217 (0)  | 197 (7)                 | 107 (2)                 | 98 (0)                 |
| 4   | 220 (1)  | 215 (8)                 | 149 (0)                 | 147 (0)                |
| 5   | 227 (1)  | 229 (2)                 | 204 (32)                | 149 (25)               |
| 6   | 394 (0)  | 288 (7)                 | 225 (1)                 | 226 (1)                |
| 7   | 447 (0)  | 297 (16)                | 231 (2)                 | 229 (1)                |
| 8   | 469 (0)  | 395 (2)                 | 241 (2)                 | 235 (1)                |
| 9   | 477 (2)  | 416 (63)                | 395 (0)                 | 396 (0)                |
| 10  | 523 (5)  | 448 (0)                 | 448 (0)                 | 447 (0)                |
| 11  | 560 (0)  | 476 (3)                 | 474 (1)                 | 473 (1)                |
| 12  | 583 (0)  | 484 (0)                 | 480 (1)                 | 481 (1)                |
| 13  | 597 (0)  | 546 (26)                | 534 (11)                | 531 (10)               |
| 14  | 667 (0)  | 566 (0)                 | 565 (0)                 | 564 (0)                |
| 15  | 687 (3)  | 587 (0)                 | 586 (0)                 | 586 (0)                |
| 16  | 729 (0)  | 619 (3)                 | 610 (3)                 | 609 (2)                |
| 17  | 789 (0)  | 668 (0)                 | 667 (0)                 | 667 (0)                |
| 18  | 807 (3)  | 700 (3)                 | 698 (2)                 | 695 (2)                |
| 19  | 808 (0)  | 729 (0)                 | 728 (0)                 | 727 (0)                |
| 20  | 816 (12) | 786 (0)                 | 787 (0)                 | 787 (0)                |
| 21  | 847 (1)  | 810 (0)                 | 810 (0)                 | 809 (0)                |

---

|    |           |           |           |           |
|----|-----------|-----------|-----------|-----------|
| 22 | 848 (0)   | 811 (0)   | 810 (0)   | 809 (0)   |
| 23 | 850 (18)  | 829 (4)   | 828 (5)   | 826 (6)   |
| 24 | 850 (14)  | 846 (3)   | 848 (2)   | 846 (2)   |
| 25 | 872 (9)   | 848 (11)  | 848 (14)  | 848 (20)  |
| 26 | 874 (3)   | 849 (12)  | 849 (8)   | 849 (1)   |
| 27 | 917 (3)   | 874 (3)   | 872 (7)   | 869 (27)  |
| 28 | 939 (0)   | 874 (9)   | 874 (8)   | 872 (8)   |
| 29 | 939 (2)   | 887 (31)  | 875 (25)  | 873 (3)   |
| 30 | 1006 (1)  | 923 (3)   | 922 (3)   | 920 (3)   |
| 31 | 1007 (1)  | 941 (4)   | 940 (3)   | 940 (2)   |
| 32 | 1010 (0)  | 972 (0)   | 959 (0)   | 956 (0)   |
| 33 | 1010 (0)  | 1002 (2)  | 1002 (2)  | 1002 (1)  |
| 34 | 1053 (3)  | 1006 (1)  | 1006 (3)  | 1006 (2)  |
| 35 | 1066 (0)  | 1007 (6)  | 1006 (2)  | 1006 (3)  |
| 36 | 1066 (0)  | 1011 (0)  | 1011 (1)  | 1011 (1)  |
| 37 | 1069 (11) | 1046 (3)  | 1044 (3)  | 1046 (3)  |
| 38 | 1094 (0)  | 1064 (16) | 1061 (1)  | 1060 (0)  |
| 39 | 1095 (0)  | 1064 (3)  | 1062 (0)  | 1061 (0)  |
| 40 | 1098 (3)  | 1065 (0)  | 1063 (17) | 1064 (16) |
| 41 | 1109 (1)  | 1095 (2)  | 1094 (2)  | 1094 (2)  |
| 42 | 1113 (9)  | 1097 (0)  | 1097 (0)  | 1097 (0)  |
| 43 | 1171 (2)  | 1102 (2)  | 1102 (2)  | 1101 (2)  |
| 44 | 1185 (0)  | 1105 (1)  | 1104 (1)  | 1105 (1)  |
| 45 | 1215 (0)  | 1125 (9)  | 1122 (9)  | 1119 (10) |
| 46 | 1221 (7)  | 1180 (0)  | 1179 (1)  | 1179 (2)  |
| 47 | 1223 (5)  | 1188 (1)  | 1183 (2)  | 1181 (0)  |
| 48 | 1224 (0)  | 1215 (0)  | 1212 (0)  | 1210 (0)  |
| 49 | 1228 (0)  | 1220 (10) | 1217 (6)  | 1215 (6)  |
| 50 | 1228 (0)  | 1221 (0)  | 1222 (0)  | 1223 (0)  |
| 51 | 1253 (10) | 1221 (11) | 1223 (14) | 1223 (12) |
| 52 | 1265 (1)  | 1233 (0)  | 1232 (0)  | 1231 (0)  |
| 53 | 1270 (0)  | 1234 (1)  | 1233 (1)  | 1232 (1)  |
| 54 | 1282 (14) | 1255 (12) | 1254 (11) | 1254 (10) |
| 55 | 1317 (3)  | 1271 (2)  | 1272 (2)  | 1271 (3)  |
| 56 | 1426 (2)  | 1273 (4)  | 1272 (3)  | 1272 (1)  |
| 57 | 1436 (12) | 1289 (15) | 1289 (15) | 1288 (14) |
| 58 | 1468 (6)  | 1325 (5)  | 1323 (5)  | 1321 (4)  |
| 59 | 1491 (0)  | 1409 (2)  | 1411 (2)  | 1416 (2)  |
| 60 | 1491 (6)  | 1422 (15) | 1424 (14) | 1427 (14) |
| 61 | 1526 (2)  | 1450 (11) | 1453 (11) | 1458 (10) |
| 62 | 1528 (1)  | 1499 (0)  | 1497 (0)  | 1496 (0)  |
| 63 | 1656 (0)  | 1500 (16) | 1498 (14) | 1497 (12) |
| 64 | 1689 (2)  | 1535 (3)  | 1532 (2)  | 1532 (3)  |

---

|    |            |            |            |            |
|----|------------|------------|------------|------------|
| 65 | 3051 (0)   | 1537 (1)   | 1534 (1)   | 1534 (2)   |
| 66 | 3051 (113) | 1619 (2)   | 1628 (1)   | 1635 (1)   |
| 67 | 3058 (82)  | 1649 (2)   | 1661 (2)   | 1667 (2)   |
| 68 | 3058 (20)  | 3037 (0)   | 3013 (0)   | 3017 (0)   |
| 69 | 3113 (0)   | 3038 (103) | 3015 (164) | 3018 (186) |
| 70 | 3113 (46)  | 3083 (4)   | 3080 (6)   | 3078 (8)   |
| 71 | 3116 (67)  | 3083 (25)  | 3080 (28)  | 3078 (28)  |
| 72 | 3117 (20)  | 3131 (12)  | 3125 (17)  | 3121 (21)  |
| 73 | 3124 (18)  | 3131 (10)  | 3125 (11)  | 3121 (14)  |
| 74 | 3125 (44)  | 3148 (9)   | 3144 (11)  | 3142 (9)   |
| 75 | 3125 (64)  | 3148 (9)   | 3144 (10)  | 3142 (13)  |
| 76 | 3128 (62)  | 3154 (23)  | 3149 (31)  | 3145 (41)  |
| 77 | 3165 (9)   | 3154 (8)   | 3149 (10)  | 3145 (10)  |
| 78 | 3180 (26)  | 3155 (0)   | 3150 (1)   | 3147 (2)   |
| 79 |            | 3158 (22)  | 3153 (28)  | 3150 (33)  |
| 80 |            | 3187 (0)   | 3178 (1)   | 3172 (2)   |
| 81 |            | 3197 (0)   | 3190 (1)   | 3184 (4)   |

| No. | 7       | 7-Li <sup>+</sup> | 7-Na <sup>+</sup> | 7-K <sup>+</sup> |
|-----|---------|-------------------|-------------------|------------------|
| 1   | 81 (3)  | 88 (0)            | 82 (0)            | 65 (6)           |
| 2   | 117 (0) | 118 (1)           | 83 (10)           | 65 (6)           |
| 3   | 118 (0) | 118 (1)           | 90 (9)            | 81 (1)           |
| 4   | 201 (0) | 199 (0)           | 122 (0)           | 120 (0)          |
| 5   | 214 (1) | 207 (2)           | 123 (1)           | 121 (0)          |
| 6   | 215 (1) | 208 (2)           | 199 (0)           | 151 (26)         |
| 7   | 229 (0) | 231 (8)           | 210 (32)          | 199 (0)          |
| 8   | 230 (0) | 232 (8)           | 217 (1)           | 216 (1)          |
| 9   | 374 (0) | 295 (7)           | 217 (1)           | 217 (1)          |
| 10  | 420 (0) | 300 (7)           | 238 (2)           | 240 (2)          |
| 11  | 421 (0) | 375 (0)           | 240 (2)           | 241 (2)          |
| 12  | 515 (2) | 412 (59)          | 376 (0)           | 377 (0)          |
| 13  | 555 (0) | 422 (0)           | 420 (0)           | 421 (0)          |
| 14  | 556 (0) | 422 (0)           | 421 (0)           | 421 (0)          |
| 15  | 575 (0) | 541 (28)          | 525 (8)           | 521 (7)          |
| 16  | 577 (0) | 561 (1)           | 561 (1)           | 560 (1)          |
| 17  | 578 (0) | 563 (1)           | 562 (1)           | 562 (1)          |
| 18  | 598 (0) | 573 (0)           | 573 (0)           | 572 (0)          |
| 19  | 693 (0) | 598 (1)           | 588 (1)           | 587 (2)          |
| 20  | 695 (0) | 598 (1)           | 589 (1)           | 587 (2)          |
| 21  | 705 (0) | 602 (0)           | 603 (1)           | 603 (1)          |
| 22  | 793 (0) | 704 (1)           | 701 (1)           | 699 (1)          |
| 23  | 795 (3) | 706 (1)           | 702 (1)           | 701 (1)          |



---

|    |          |           |           |           |
|----|----------|-----------|-----------|-----------|
| 24 | 797 (3)  | 707 (0)   | 706 (0)   | 705 (0)   |
| 25 | 807 (0)  | 789 (0)   | 789 (0)   | 791 (0)   |
| 26 | 808 (0)  | 796 (3)   | 795 (3)   | 794 (3)   |
| 27 | 809 (0)  | 796 (3)   | 795 (3)   | 794 (3)   |
| 28 | 830 (0)  | 812 (0)   | 811 (0)   | 811 (0)   |
| 29 | 831 (0)  | 812 (0)   | 811 (0)   | 811 (0)   |
| 30 | 853 (0)  | 813 (0)   | 811 (0)   | 811 (0)   |
| 31 | 861 (0)  | 837 (1)   | 835 (1)   | 834 (1)   |
| 32 | 863 (21) | 837 (1)   | 835 (1)   | 835 (1)   |
| 33 | 864 (21) | 849 (0)   | 847 (0)   | 850 (0)   |
| 34 | 891 (0)  | 859 (0)   | 856 (1)   | 858 (1)   |
| 35 | 898 (0)  | 863 (25)  | 863 (23)  | 863 (22)  |
| 36 | 899 (0)  | 864 (25)  | 863 (23)  | 863 (22)  |
| 37 | 982 (3)  | 895 (0)   | 895 (0)   | 895 (0)   |
| 38 | 982 (3)  | 905 (0)   | 903 (0)   | 902 (0)   |
| 39 | 1005 (0) | 905 (0)   | 904 (0)   | 903 (0)   |
| 40 | 1005 (3) | 983 (9)   | 983 (7)   | 983 (6)   |
| 41 | 1009 (0) | 983 (9)   | 984 (7)   | 984 (6)   |
| 42 | 1009 (0) | 1002 (1)  | 1000 (1)  | 998 (2)   |
| 43 | 1038 (1) | 1007 (1)  | 1005 (0)  | 1003 (0)  |
| 44 | 1040 (4) | 1007 (0)  | 1005 (0)  | 1003 (0)  |
| 45 | 1040 (4) | 1007 (0)  | 1006 (11) | 1006 (1)  |
| 46 | 1065 (0) | 1031 (1)  | 1028 (0)  | 1030 (0)  |
| 47 | 1065 (0) | 1038 (2)  | 1037 (2)  | 1037 (2)  |
| 48 | 1066 (0) | 1039 (2)  | 1038 (2)  | 1037 (2)  |
| 49 | 1074 (5) | 1064 (0)  | 1060 (0)  | 1059 (0)  |
| 50 | 1075 (5) | 1065 (0)  | 1061 (0)  | 1060 (1)  |
| 51 | 1092 (0) | 1065 (0)  | 1061 (0)  | 1060 (0)  |
| 52 | 1092 (0) | 1069 (13) | 1067 (11) | 1068 (10) |
| 53 | 1092 (0) | 1069 (13) | 1068 (11) | 1068 (10) |
| 54 | 1108 (0) | 1096 (0)  | 1095 (0)  | 1095 (0)  |
| 55 | 1113 (9) | 1097 (0)  | 1096 (0)  | 1096 (0)  |
| 56 | 1114 (9) | 1097 (0)  | 1096 (0)  | 1097 (0)  |
| 57 | 1174 (0) | 1110 (0)  | 1109 (0)  | 1109 (0)  |
| 58 | 1187 (0) | 1126 (10) | 1122 (10) | 1120 (10) |
| 59 | 1221 (4) | 1126 (10) | 1123 (10) | 1121 (10) |
| 60 | 1222 (5) | 1166 (0)  | 1165 (0)  | 1166 (0)  |
| 61 | 1222 (0) | 1204 (0)  | 1198 (0)  | 1195 (0)  |
| 62 | 1222 (5) | 1222 (1)  | 1217 (4)  | 1216 (4)  |
| 63 | 1223 (1) | 1222 (4)  | 1218 (4)  | 1216 (4)  |
| 64 | 1226 (0) | 1222 (11) | 1223 (1)  | 1223 (0)  |
| 65 | 1226 (0) | 1223 (8)  | 1224 (15) | 1224 (4)  |
| 66 | 1227 (0) | 1223 (3)  | 1224 (0)  | 1224 (9)  |

---

---

|     |      |       |      |       |      |       |      |       |
|-----|------|-------|------|-------|------|-------|------|-------|
| 67  | 1231 | (0)   | 1229 | (0)   | 1225 | (0)   | 1225 | (0)   |
| 68  | 1266 | (0)   | 1234 | (1)   | 1232 | (1)   | 1232 | (1)   |
| 69  | 1266 | (0)   | 1234 | (1)   | 1233 | (1)   | 1232 | (1)   |
| 70  | 1274 | (0)   | 1236 | (0)   | 1235 | (0)   | 1235 | (0)   |
| 71  | 1284 | (15)  | 1265 | (4)   | 1265 | (3)   | 1266 | (2)   |
| 72  | 1285 | (15)  | 1266 | (4)   | 1265 | (3)   | 1266 | (2)   |
| 73  | 1327 | (0)   | 1285 | (0)   | 1283 | (0)   | 1281 | (0)   |
| 74  | 1368 | (10)  | 1292 | (19)  | 1291 | (18)  | 1290 | (18)  |
| 75  | 1369 | (10)  | 1292 | (20)  | 1291 | (18)  | 1290 | (18)  |
| 76  | 1490 | (0)   | 1340 | (0)   | 1336 | (0)   | 1333 | (0)   |
| 77  | 1490 | (0)   | 1353 | (8)   | 1353 | (8)   | 1357 | (8)   |
| 78  | 1491 | (10)  | 1353 | (7)   | 1353 | (7)   | 1358 | (8)   |
| 79  | 1518 | (0)   | 1498 | (0)   | 1496 | (0)   | 1494 | (0)   |
| 80  | 1524 | (2)   | 1498 | (12)  | 1496 | (6)   | 1495 | (1)   |
| 81  | 1525 | (2)   | 1498 | (13)  | 1497 | (18)  | 1495 | (18)  |
| 82  | 1551 | (0)   | 1506 | (0)   | 1510 | (0)   | 1514 | (0)   |
| 83  | 1710 | (2)   | 1532 | (2)   | 1530 | (2)   | 1528 | (2)   |
| 84  | 1710 | (2)   | 1533 | (2)   | 1531 | (2)   | 1530 | (2)   |
| 85  | 3049 | (19)  | 1542 | (0)   | 1542 | (1)   | 1543 | (2)   |
| 86  | 3049 | (0)   | 1666 | (3)   | 1679 | (3)   | 1686 | (3)   |
| 87  | 3050 | (150) | 1666 | (3)   | 1679 | (3)   | 1686 | (3)   |
| 88  | 3056 | (85)  | 3035 | (4)   | 3012 | (0)   | 3014 | (1)   |
| 89  | 3057 | (86)  | 3035 | (0)   | 3012 | (2)   | 3014 | (0)   |
| 90  | 3058 | (0)   | 3036 | (151) | 3014 | (243) | 3016 | (277) |
| 91  | 3111 | (1)   | 3080 | (6)   | 3078 | (8)   | 3076 | (10)  |
| 92  | 3111 | (0)   | 3080 | (5)   | 3079 | (7)   | 3076 | (9)   |
| 93  | 3112 | (68)  | 3080 | (39)  | 3079 | (41)  | 3077 | (41)  |
| 94  | 3115 | (71)  | 3128 | (14)  | 3122 | (19)  | 3118 | (23)  |
| 95  | 3115 | (73)  | 3128 | (12)  | 3122 | (14)  | 3118 | (18)  |
| 96  | 3116 | (1)   | 3129 | (13)  | 3123 | (14)  | 3119 | (17)  |
| 97  | 3125 | (1)   | 3144 | (15)  | 3142 | (15)  | 3139 | (16)  |
| 98  | 3126 | (1)   | 3144 | (15)  | 3142 | (16)  | 3139 | (17)  |
| 99  | 3126 | (0)   | 3144 | (8)   | 3142 | (8)   | 3140 | (9)   |
| 100 | 3129 | (138) | 3152 | (0)   | 3146 | (0)   | 3143 | (0)   |
| 101 | 3129 | (137) | 3153 | (0)   | 3147 | (0)   | 3143 | (0)   |
| 102 | 3131 | (1)   | 3153 | (0)   | 3147 | (1)   | 3143 | (1)   |
| 103 |      |       | 3155 | (39)  | 3149 | (55)  | 3146 | (66)  |
| 104 |      |       | 3155 | (43)  | 3150 | (57)  | 3146 | (66)  |
| 105 |      |       | 3156 | (5)   | 3150 | (2)   | 3147 | (1)   |

---

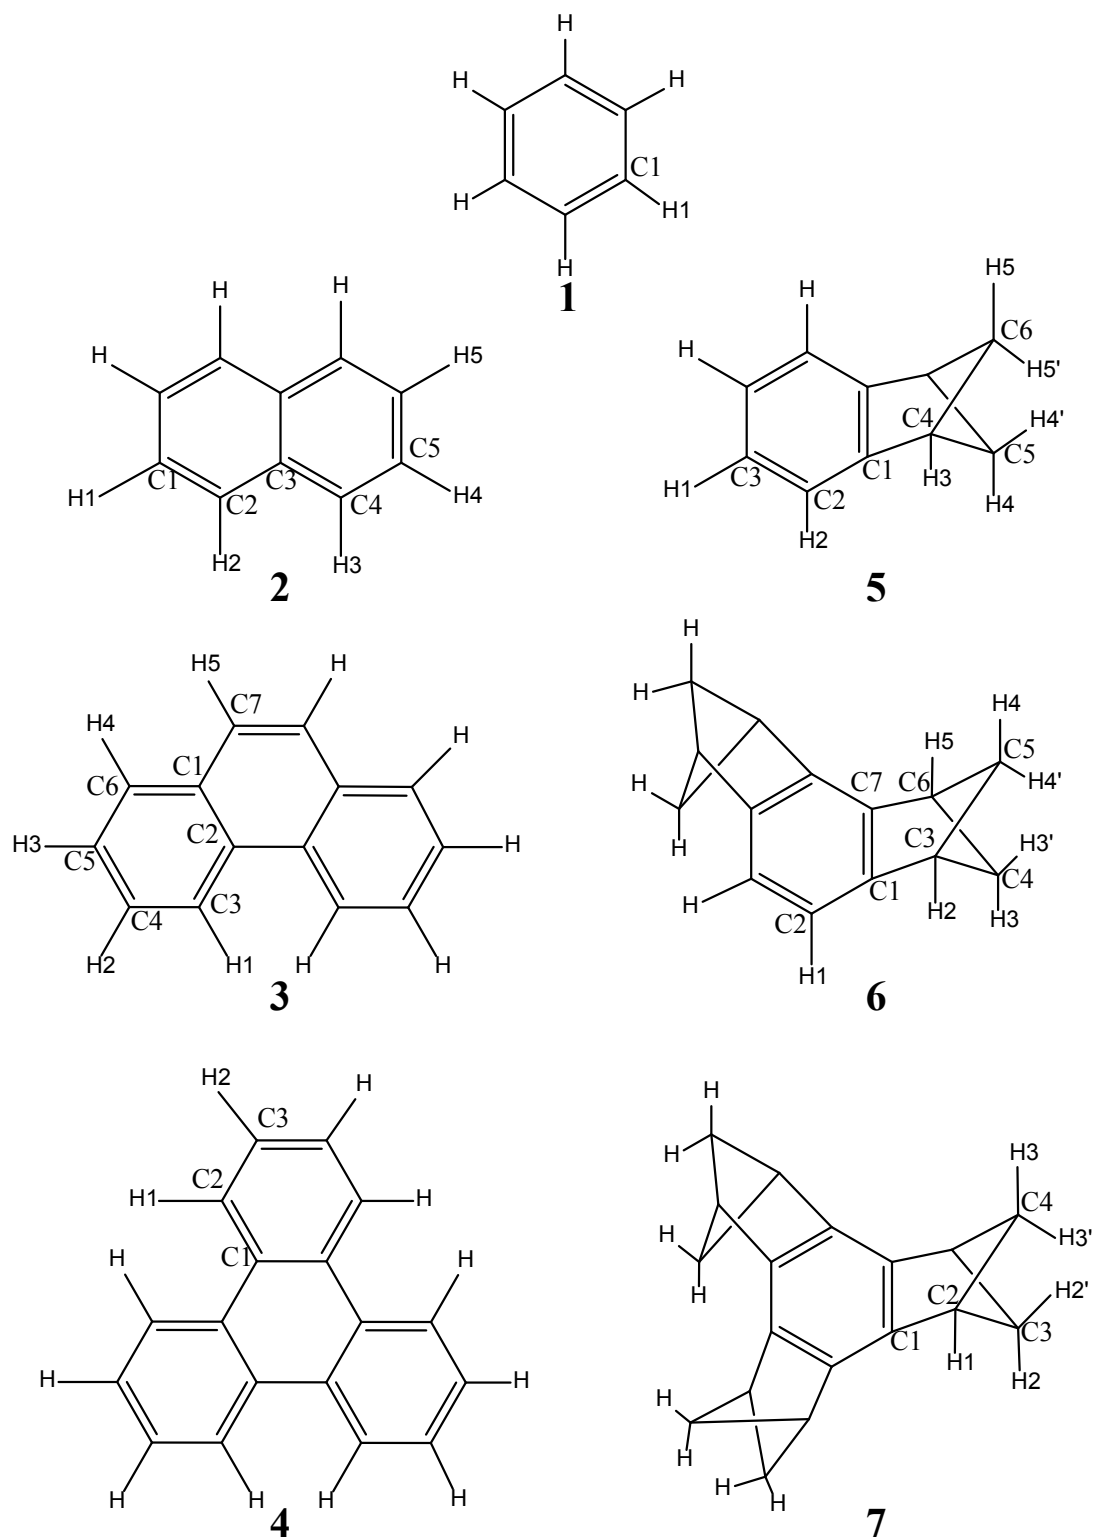

**Scheme S1:** Structures of ligands with atom numbering that was used for providing NMR chemical shift values.

**Table S4:**  $^{13}\text{C}$  and  $^1\text{H}$  NMR chemical shift values for ligands obtained at the B3LYP/6-311+G(2d,2p) and B3LYP/6-31++G(3df,2p) levels along with the experimental values. Computed chemical shift values are in reference to tetramethylsilane (TMS).

|                                 | B3LYP/<br>6-311+G(2d,2p) | B3LYP/<br>6-31++G(3df,2p) | Experimental |
|---------------------------------|--------------------------|---------------------------|--------------|
| <b>Ligand (1)<sup>a,b</sup></b> |                          |                           |              |
| C1                              | 134.94                   | 125.73                    | 128.36       |
| H1                              | 7.78                     | 7.72                      | 7.34         |
| <b>Ligand (2)<sup>b</sup></b>   |                          |                           |              |
| C1                              | 132.14                   | 122.96                    | 125.75       |
| C2                              | 134.93                   | 125.42                    | 127.84       |
| C3                              | 142.33                   | 134.21                    | 133.45       |
| C4                              | 134.93                   | 125.42                    | 127.84       |
| C5                              | 132.14                   | 122.96                    | 125.75       |
| H1                              | 7.91                     | 7.85                      | 7.48         |
| H2                              | 8.36                     | 8.36                      | 7.84         |
| H3                              | 8.36                     | 8.36                      | 7.84         |
| H4                              | 7.91                     | 7.85                      | 7.48         |
| <b>Ligand (3)<sup>b</sup></b>   |                          |                           |              |
| C1                              | 140.81                   | 133.61                    | 131.99       |
| C2                              | 139.01                   | 131.90                    | 130.25       |
| C3                              | 128.90                   | 121.35                    | 122.59       |
| C4                              | 132.45                   | 123.26                    | -            |
| C5                              | 132.80                   | 123.86                    | 126.46       |
| C6                              | 135.00                   | 126.35                    | 128.46       |
| C7                              | 134.33                   | 126.40                    | 126.84       |
| H1                              | 9.27                     | 9.25                      | 8.65         |
| H2                              | 8.10                     | 8.04                      | 7.61         |
| H3                              | 8.04                     | 7.98                      | 7.57         |
| H4                              | 8.31                     | 8.34                      | 7.86         |
| H5                              | 8.20                     | 8.15                      | 7.70         |
| <b>Ligand (4)<sup>b</sup></b>   |                          |                           |              |
| C1                              | 138.65                   | 132.09                    | 129.82       |
| C2                              | 128.84                   | 120.68                    | 123.31       |
| C3                              | 132.74                   | 124.78                    | 127.21       |

|                         |        |        |        |
|-------------------------|--------|--------|--------|
| H1                      | 9.27   | 9.24   | 8.64   |
| H2                      | 8.04   | 7.95   | 7.64   |
| <hr/>                   |        |        |        |
| Ligand (7) <sup>c</sup> |        |        |        |
| C1                      | 144.35 | 136.42 | 135.89 |
| C2                      | 50.44  | 49.81  | 43.96  |
| C3                      | 64.32  | 62.83  | 58.66  |
| C4                      | 64.32  | 62.83  | 58.66  |
| <hr/>                   |        |        |        |
| H1                      | 3.25   | 3.35   | 3.22   |
| H2                      | 2.27   | 2.11   | 2.27   |
| H2'                     | 2.86   | 2.81   | 2.52   |
| H3                      | 2.27   | 2.11   | 2.27   |
| H3'                     | 2.86   | 2.81   | 2.52   |

<sup>a</sup>Experimental values were taken from ref. Pouchert, C. J.; Behnke, J. *The Aldrich Library of <sup>13</sup>C and <sup>1</sup>H FT NMR Spectra*, 1<sup>st</sup> ed.; Aldrich: St. Louis, MO, 1993.

<sup>b</sup>Experimental values were taken from ref. National Institute of Advanced Industrial Science and Technology (AIST), Japan. Spectral Database for Organic Compounds, SDDBS. <http://riodb01.ibase.aist.go.jp/sdbs/>.

<sup>c</sup>Experimental values were taken from ref. Frank, N. L.; Baldrige, K. K.; Siegel, J. S. *J. Am. Chem. Soc.* **1995**, *117*, 2102.

**Table S5:**  $^{13}\text{C}$  and  $^1\text{H}$  NMR chemical shift values obtained for ligands and complexes at the B3LYP/6-31++G(3df,2p) level. The computed chemical shift values are in reference to tetramethylsilane (TMS).

| <b>System 1</b> |            |                   |                   |                  |
|-----------------|------------|-------------------|-------------------|------------------|
|                 | Ligand (1) | 1-Li <sup>+</sup> | 1-Na <sup>+</sup> | 1-K <sup>+</sup> |
| C1              | 125.73     | 129.55            | 128.68            | 128.45           |
| H1              | 7.72       | 8.50              | 8.42              | 8.26             |
| <b>System 2</b> |            |                   |                   |                  |
|                 | Ligand (2) | 2-Li <sup>+</sup> | 2-Na <sup>+</sup> | 2-K <sup>+</sup> |
| C1              | 122.96     | 122.29            | 122.76            | 123.83           |
| C2              | 125.42     | 128.04            | 127.47            | 127.96           |
| C3              | 134.21     | 130.87            | 131.11            | 131.64           |
| C4              | 125.42     | 127.29            | 126.94            | 126.89           |
| C5              | 122.96     | 133.1             | 130.92            | 129.45           |
| H1              | 7.85       | 8.36              | 8.33              | 8.22             |
| H2              | 8.36       | 8.86              | 8.8               | 8.62             |
| H3              | 8.36       | 8.78              | 8.71              | 8.56             |
| H4              | 7.85       | 8.72              | 8.60              | 8.49             |
| <b>System 3</b> |            |                   |                   |                  |
|                 | Ligand (3) | 3-Li <sup>+</sup> | 3-Na <sup>+</sup> | 3-K <sup>+</sup> |
| C1              | 133.61     | 126.81            | 128.52            | 129.59           |
| C2              | 131.90     | 127.18            | 127.75            | 129.28           |
| C3              | 121.35     | 123.45            | 122.4             | 121.16           |
| C4              | 123.26     | 132.31            | 130.35            | 129.27           |
| C5              | 123.86     | 131.43            | 129.68            | 128.19           |
| C6              | 126.35     | 128.81            | 128.09            | 128.25           |
| C7              | 126.40     | 124.35            | 125.10            | 125.31           |
| H1              | 9.25       | 9.52              | 9.50              | 9.47             |
| H2              | 8.04       | 8.77              | 8.67              | 8.55             |
| H3              | 7.98       | 8.68              | 8.59              | 8.51             |
| H4              | 8.34       | 8.77              | 8.70              | 8.59             |
| H5              | 8.15       | 8.60              | 8.53              | 8.42             |
| <b>System 4</b> |            |                   |                   |                  |
|                 | Ligand (4) | 4-Li <sup>+</sup> | 4-Na <sup>+</sup> | 4-K <sup>+</sup> |
| C1              | 132.09     | 125.17            | 126.74            | 128.69           |

|    |        |        |        |        |
|----|--------|--------|--------|--------|
| C2 | 120.68 | 123.71 | 122.92 | 122.15 |
| C3 | 124.78 | 131.37 | 130.01 | 128.90 |
| H1 | 9.24   | 9.51   | 9.46   | 9.41   |
| H2 | 7.95   | 8.67   | 8.57   | 8.48   |

### System 5

|     | Ligand (5) | 5-Li <sup>+</sup> | 5-Na <sup>+</sup> | 5-K <sup>+</sup> |
|-----|------------|-------------------|-------------------|------------------|
| C1  | 151.05     | 160.68            | 158.86            | 157.55           |
| C2  | 116.94     | 120.53            | 119.38            | 119.55           |
| C3  | 121.29     | 122.76            | 122.57            | 122.88           |
| C4  | 50.35      | 52.52             | 52.02             | 51.9             |
| C5  | 66.19      | 70.91             | 71.29             | 68.66            |
| C6  | 66.19      | 69.65             | 68.14             | 68.51            |
| H1  | 7.33       | 7.94              | 7.86              | 7.73             |
| H2  | 7.54       | 8.14              | 8.11              | 7.96             |
| H3  | 3.17       | 3.68              | 3.64              | 3.56             |
| H4  | 2.43       | 2.23              | 2.0               | 1.96             |
| H4' | 2.88       | 3.46              | 3.5               | 3.42             |
| H5  | 2.43       | 2.94              | 2.88              | 2.84             |
| H5' | 2.88       | 3.36              | 3.31              | 3.28             |

### System 6

|     | Ligand (6) | 6-Li <sup>+</sup> | 6-Na <sup>+</sup> | 6-K <sup>+</sup> |
|-----|------------|-------------------|-------------------|------------------|
| C1  | 147.19     | 154.79            | 152.96            | 152.01           |
| C2  | 113.92     | 113.55            | 112.86            | 111.87           |
| C3  | 53.71      | 53.73             | 53.18             | 53.61            |
| C4  | 65.72      | 69.09             | 68.30             | 66.42            |
| C5  | 65.72      | 68.06             | 66.02             | 67.37            |
| C6  | 50.02      | 51.03             | 51.50             | 49.64            |
| C7  | 141.29     | 148.8             | 146.8             | 145.59           |
| H1  | 7.08       | 7.6               | 7.61              | 7.43             |
| H2  | 3.22       | 3.67              | 3.58              | 3.54             |
| H3  | 2.26       | 1.98              | 1.82              | 1.68             |
| H3' | 3.22       | 3.67              | 3.58              | 3.54             |
| H4  | 2.26       | 2.66              | 2.63              | 2.57             |
| H4' | 2.87       | 3.28              | 3.16              | 3.15             |
| H5  | 3.20       | 3.66              | 3.67              | 3.61             |

### System 7

|  | Ligand (7) | 7-Li <sup>+</sup> | 7-Na <sup>+</sup> | 7-K <sup>+</sup> |
|--|------------|-------------------|-------------------|------------------|
|--|------------|-------------------|-------------------|------------------|

|     |        |        |        |        |
|-----|--------|--------|--------|--------|
| C1  | 136.42 | 142.36 | 140.82 | 140.19 |
| C2  | 49.81  | 50.40  | 52.55  | 51.85  |
| C3  | 62.83  | 65.87  | 67.80  | 64.10  |
| C4  | 62.83  | 63.9   | 65.07  | 66.09  |
| H1  | 3.35   | 3.72   | 3.72   | 3.63   |
| H2  | 2.11   | 1.81   | 1.52   | 1.50   |
| H2' | 2.81   | 3.29   | 3.45   | 3.32   |
| H3  | 2.11   | 2.51   | 2.46   | 2.39   |
| H3' | 2.81   | 3.16   | 3.23   | 3.17   |



**Table S6:** Atomic Contributions to the Total Energy,  $E(\Omega)$ , of phenanthrene and triphenylene and their corresponding linear counterparts anthracene and naphthacene (in hartree) calculated with the Quantum Theory of Atoms in Molecules (QTAIM) at the B3LYP/6-311+G(2d,2p) level. (See Scheme 2 for atom numbering)

| Phenanthrene           |           | Anthracene             |           | Triphenylene           |           | Naphthacene            |           |
|------------------------|-----------|------------------------|-----------|------------------------|-----------|------------------------|-----------|
| E( $\Omega$ ), hartree |           |
| C1                     | -38.09758 | C1                     | -38.09358 | C1                     | -38.10024 | C1                     | -38.09297 |
| C2                     | -38.09392 | C2                     | -38.08860 | C2                     | -38.09756 | C2                     | -38.08777 |
| C3                     | -38.09144 | C3                     | -38.08860 | C3                     | -38.09756 | C3                     | -38.08777 |
| C4                     | -38.09485 | C4                     | -38.09358 | C4                     | -38.10024 | C4                     | -38.09297 |
| C5                     | -38.09485 | C5                     | -38.09358 | C5                     | -38.10024 | C5                     | -38.09732 |
| C6                     | -38.09144 | C6                     | -38.08860 | C6                     | -38.09756 | C6                     | -38.09732 |
| C7                     | -38.09392 | C7                     | -38.08860 | C7                     | -38.09756 | C7                     | -38.09297 |
| C8                     | -38.09758 | C8                     | -38.09358 | C8                     | -38.10024 | C8                     | -38.08777 |
| C9                     | -38.10034 | C9                     | -38.09846 | C9                     | -38.10024 | C9                     | -38.08777 |
| C10                    | -38.10034 | C10                    | -38.09846 | C10                    | -38.09756 | C10                    | -38.09297 |
| C11                    | -38.12279 | C11                    | -38.12279 | C11                    | -38.09756 | C11                    | -38.09732 |
| C12                    | -38.10143 | C12                    | -38.12279 | C12                    | -38.10024 | C12                    | -38.09732 |
| C13                    | -38.10143 | C13                    | -38.12279 | C13                    | -38.09946 | C13                    | -38.12114 |
| C14                    | -38.12279 | C14                    | -38.12279 | C14                    | -38.09946 | C14                    | -38.12114 |
| H15                    | -0.62739  | H15                    | -0.62627  | C15                    | -38.09946 | C15                    | -38.12164 |
| H16                    | -0.62625  | H16                    | -0.62654  | C16                    | -38.09946 | C16                    | -38.12164 |
| H17                    | -0.62708  | H17                    | -0.62654  | C17                    | -38.09946 | C17                    | -38.12114 |
| H18                    | -0.63474  | H18                    | -0.62627  | C18                    | -38.09946 | C18                    | -38.12114 |
| H19                    | -0.63474  | H19                    | -0.62627  | H19                    | -0.63780  | H19                    | -0.62610  |
| H20                    | -0.62708  | H20                    | -0.62654  | H20                    | -0.62678  | H20                    | -0.62643  |
| H21                    | -0.62625  | H21                    | -0.62654  | H21                    | -0.62678  | H21                    | -0.62643  |
| H22                    | -0.62739  | H22                    | -0.62627  | H22                    | -0.63780  | H22                    | -0.62610  |
| H23                    | -0.62675  | H23                    | -0.62651  | H23                    | -0.63780  | H23                    | -0.62638  |
| H24                    | -0.62675  | H24                    | -0.62651  | H24                    | -0.62678  | H24                    | -0.62638  |
|                        |           |                        |           | H25                    | -0.62678  | H25                    | -0.62610  |
|                        |           |                        |           | H26                    | -0.63780  | H26                    | -0.62643  |
|                        |           |                        |           | H27                    | -0.63780  | H27                    | -0.62643  |
|                        |           |                        |           | H28                    | -0.62678  | H28                    | -0.62610  |
|                        |           |                        |           | H29                    | -0.62678  | H29                    | -0.62638  |
|                        |           |                        |           | H30                    | -0.63780  | H30                    | -0.62638  |

**Table S7:** Atomic energy (in hartrees),  $E(\Omega)$  obtained with atomic integration of atomic basins by QTAIM at the B3LYP/6-311+G(2d,2p) level. The table lists the sum of atomic energy of all carbon atoms,  $\sum E(\Omega_C)$ ; sum of atomic energy of all hydrogen atoms,  $\sum E(\Omega_H)$ ; average energy of all hydrogen atoms,  $\bar{E}_H$ ; and average energy of hydrogen atoms involved in hydrogen-hydrogen interaction,  $\bar{E}_{H\cdots H}$ ; all these values are reported in hartrees. The following entities  $\Delta E(\Omega_C)$ ,  $\Delta E(\Omega_H)$ ,  $[\Delta E(\Omega_H)+\Delta E(\Omega_C)]$ ,  $\Delta \bar{E}_H$ ,  $(\bar{E}_{H\cdots H} - \bar{E}_H)$  are reported in kcal/mol. (See Table S6 for individual atomic contributions to total energies of systems).

|                                                                                           | Case I                |                 | Case II               |                 |
|-------------------------------------------------------------------------------------------|-----------------------|-----------------|-----------------------|-----------------|
|                                                                                           | Phenanthrene          | Anthracene      | Triphenylene          | Naphthacene     |
| Sum of atomic energy of all carbon atoms, $\sum E(\Omega_C)$                              | -533.40470            | -533.41681      | -685.78352            | -685.8401       |
| $\Delta E(\Omega_C)$ , <sup>a</sup> kcal/mol                                              | +7.60                 | 0.0             | +35.50                | 0.0             |
| Sum of atomic energy of all hydrogen atoms, $\sum E(\Omega_H)$                            | -6.28444              | -6.26426        | -7.58751              | -7.51562        |
| $\Delta E(\Omega_H)$ , <sup>a,b</sup> kcal/mol                                            | -12.66                | 0.0             | -45.11                | 0.0             |
| $[\Delta E(\Omega_H)+\Delta E(\Omega_C)]$ , <sup>c</sup> kcal/mol                         | -5.06                 | 0.0             | -9.61                 | 0.0             |
| Average energy of hydrogen atoms, $\bar{E}_H$                                             | -0.62687 <sup>d</sup> | -0.62643        | -0.62678 <sup>d</sup> | -0.62630        |
| $\Delta \bar{E}_H$ , kcal/mol                                                             | -0.28                 | 0.0             | -0.30                 | 0.0             |
| Average energy of the hydrogen atoms involved in H $\cdots$ H interaction, $\bar{E}_{HH}$ | -0.63474              | NA <sup>e</sup> | -0.63780              | NA <sup>e</sup> |
| $(\bar{E}_{H\cdots H} - \bar{E}_H)$ , kcal/mol                                            | -5.22 <sup>f</sup>    | NA <sup>e</sup> | -7.22 <sup>f</sup>    | NA <sup>e</sup> |

<sup>a</sup> Calculated as nonlinear – linear aromatic system; for example, Phenanthrene – Anthracene.

<sup>b</sup> The negative values indicate the hydrogen atoms of nonlinear aromatic compound is more stabilized compared to linear aromatic system.

<sup>c</sup> The negative values indicate nonlinear aromatic compound is more stabilized compared to linear aromatic system. Phenanthrene is more stable by 5.06 kcal/mol than anthracene; triphenylene is more stable by 9.61 kcal/mol than naphthacene.

<sup>d</sup> Average energy of all hydrogen atoms not involved in hydrogen-hydrogen interaction in the cyclic system

<sup>e</sup> NA means not applicable.

<sup>f</sup> Difference in energy between the average energy of the hydrogen involved in H $\cdots$ H interaction in the cyclic system and the average energy of all hydrogen atoms in the linear counterpart.

**Table S8:** Selected vibrational frequencies ( $\nu_{\text{C-H}}$ , in  $\text{cm}^{-1}$ ) corresponding to C–H bonds of bridge  $\text{CH}_2$  unit (that is not on the side of metal ion binding) of bicyclo[2.1.1]hexenyl moiety of ligands (**5-7**) and their complexes obtained at the B3LYP/6-311+G(2d,2p) level. Intensities (km/mol) are given in parentheses.

|                        | Endo C–H bond length | $\nu_{\text{C-H}}$ , in $\text{cm}^{-1}$ (a) | Exo C–H bond length | $\nu_{\text{C-H}}$ , in $\text{cm}^{-1}$ (b) |
|------------------------|----------------------|----------------------------------------------|---------------------|----------------------------------------------|
| <b>5</b>               | 1.088                | 3052 (57)                                    | 1.090               | 3114 (23)                                    |
| <b>5Li<sup>+</sup></b> | 1.087                | 3085 (12)                                    | 1.087               | 3151 (6)                                     |
| <b>5Na<sup>+</sup></b> | 1.087                | 3083 (14)                                    | 1.087               | 3147 (8)                                     |
| <b>5K<sup>+</sup></b>  | 1.087                | 3080 (16)                                    | 1.087               | 3154 (6)                                     |
| <b>6</b>               | 1.089                | 3051 (113)                                   | 1.090               | 3113 (46)                                    |
| <b>6Li<sup>+</sup></b> | 1.087                | 3083(25)                                     | 1.087               | 3148 (9)                                     |
| <b>6Na<sup>+</sup></b> | 1.087                | 3080 (28)                                    | 1.087               | 3144 (11)                                    |
| <b>6K<sup>+</sup></b>  | 1.087                | 3078 (29)                                    | 1.088               | 3142 (13)                                    |
| <b>7</b>               | 1.089                | 3050 (150)                                   | 1.090               | 3112 (68)                                    |
| <b>7Li<sup>+</sup></b> | 1.087                | 3080 (39)                                    | 1.087               | 3144 (15)                                    |
| <b>7Na<sup>+</sup></b> | 1.087                | 3079 (41)                                    | 1.087               | 3142 (16)                                    |
| <b>7K<sup>+</sup></b>  | 1.087                | 3076 (41)                                    | 1.088               | 3139 (17)                                    |

(a) Endo C–H bond experiences more stretching than the exo C–H bond, and the stretching is symmetric.

(b) Exo C–H bond experience more stretching than the endo C–H bond, and the stretching is asymmetric.
